1 **Fluorescence Activation Mechanism and Imaging of Drug Permeation**  
2 **with New Sensors for Smoking-Cessation Ligands**  
3

4 **Authors:** Aaron L. Nichols\*<sup>1</sup>, Zack Blumenfeld\*<sup>1,2</sup>, Chengcheng Fan\*<sup>5</sup>, Laura  
5 Luebbert\*<sup>1,3</sup>, Annet E. M. Blom<sup>5</sup>, Bruce N. Cohen<sup>1</sup>, Jonathan S. Marvin<sup>4</sup>, Philip M.  
6 Borden<sup>4</sup>, Charlene H. Kim<sup>1</sup>, Anand K. Muthusamy<sup>5</sup>, Amol V. Shivange<sup>1</sup>, Hailey J.  
7 Knox<sup>5</sup>, Hugo Rego Campello<sup>6</sup>, Jonathan H. Wang<sup>1</sup>, Dennis A. Dougherty<sup>5</sup>, Loren L.  
8 Looger<sup>4</sup>, Timothy Gallagher<sup>6</sup>, Douglas C. Rees<sup>5,7</sup>, Henry A. Lester<sup>1a</sup>  
9

10 \* Co-first authors  
11

12 <sup>1</sup> **Division of Biology and Biological Engineering, California Institute of**  
13 **Technology, Pasadena, CA**

14 <sup>2</sup> **Keck School of Medicine, University of Southern California, Los Angeles, CA**

15 <sup>3</sup> **Institute of Biology, Leiden University, Leiden, The Netherlands**

16 <sup>4</sup> **Janelia Research Campus, Howard Hughes Medical Institute, Ashburn, VA**

17 <sup>5</sup> **Division of Chemistry and Chemical Engineering, California Institute of**  
18 **Technology, Pasadena, CA**

19 <sup>6</sup> **School of Chemistry, University of Bristol, Bristol, United Kingdom**

20 <sup>7</sup> **Howard Hughes Medical Institute, California Institute of Technology,**  
21 **Pasadena, CA**

22  
23 <sup>a</sup> Corresponding author

24 E-mail: [lester@caltech.edu](mailto:lester@caltech.edu)  
25

26 **ABSTRACT**

27 Nicotinic partial agonists provide an accepted aid for smoking cessation and thus contribute to  
28 decreasing tobacco-related disease. Improved drugs constitute a continued area of study.  
29 However, there remains no reductionist method to examine the cellular and subcellular  
30 pharmacokinetic properties of these compounds in living cells. Here, we developed new intensity-  
31 based drug sensing fluorescent reporters (“iDrugSnFRs”) for the nicotinic partial agonists  
32 dianicline, cytisine, and two cytisine derivatives – 10-fluorocytisine and 9-bromo-10-ethylcytisine.  
33 We report the first atomic-scale structures of liganded periplasmic binding protein-based  
34 biosensors, accelerating development of iDrugSnFRs and also explaining the activation  
35 mechanism. The nicotinic iDrugSnFRs detect their drug partners in solution, as well as at the  
36 plasma membrane (PM) and in the endoplasmic reticulum (ER) of cell lines and mouse  
37 hippocampal neurons. At the PM, the speed of solution changes limits the growth and decay rates  
38 of the fluorescence response in almost all cases. In contrast, we found that rates of membrane  
39 crossing differ among these nicotinic drugs by > 30 fold. The new nicotinic iDrugSnFRs provide  
40 insight into the real-time pharmacokinetic properties of nicotinic agonists and provide a  
41 methodology whereby iDrugSnFRs can inform both pharmaceutical neuroscience and addiction  
42 neuroscience.

43

## 44 INTRODUCTION

45 Because drugs for smoking cessation partially help to decrease tobacco-related disease,  
46 drug discovery efforts have targeted nicotinic acetylcholine receptors (nAChRs). The addictive  
47 tobacco alkaloid nicotine itself, via transdermal patches and other devices, remains available for  
48 people trying to quit smoking.

49 Prior work suggests that partial agonists with lower efficacy than nicotine could serve as  
50 effective smoking-cessation drugs (Rose, et al., 1994), and efforts continue in that direction  
51 (Rollema & Hurst, 2018). Another plant alkaloid, (-)-cytisine (also called cytisinicline and Tabex®),  
52 an  $\alpha 4\beta 2$  nAChR partial agonist, served as a basis for the synthesis of analogs which have not yet  
53 entered the clinic (Chellappan, Xiao, Tueckmantel, Kellar, & Kozikowski, 2006; Houllier, Gouault,  
54 Lasne, & Rouden, 2006; Imming, Klaperski, Stubbs, Seitz, & Gundisch, 2001; Kozikowski, et al.,  
55 2007; Marcaurelle, Johannes, Yohannes, Tillotson, & Mann, 2009; Philipova, et al., 2015;  
56 Rouden, et al., 2002). Varenicline (Chantix®) has four rings, two more than nicotine or cytisine,  
57 and is currently the only FDA-approved smoking-cessation drug, but the modest quit rate of ~18%  
58 at 12 months invites further investigation (Coe, et al., 2005; Mills, Wu, Spurden, Ebbert, & Wilson,  
59 2009). Dianicline, another tetracyclic compound, was discontinued after unfavorable Phase III  
60 clinical trials (Cohen, et al., 2003; Fagerstrom & Balfour, 2006).

61 A nicotinic ligand for smoking cessation must satisfy at least three criteria (Rollema, et al.,  
62 2010; Tashkin, 2015). 1) It must enter the brain, where the most nicotine-sensitive nAChRs ( $\alpha 4\beta 2$ )  
63 occur. It must also 2) activate  $\alpha 4\beta 2$  nAChRs with an  $EC_{50}$  sufficient to reduce cravings and  
64 withdrawal (1–2  $\mu M$ ). It must also 3) block nicotine binding to reduce the reward phase of smoking  
65 (2 to 30 min). Varenicline meets these criteria, while cytisine (low brain penetration) and dianicline  
66 ( $EC_{50} = 18 \mu M$ ) each fail one of the criteria (Rollema, et al., 2010).

67 Membrane permeation is interesting for investigating and treating nicotine addiction in at least  
68 two ways. Firstly, note criterion #1 above. Enhancing the membrane permeability of cytisine

69 analogs and probing nAChR subtype selectivity was addressed via direct functionalization of (-)-  
70 cytosine within the pyridone ring (Rego Campello, et al., 2018). Two of the resulting derivatives,  
71 10-fluorocytosine and 9-bromo-10-ethylcytosine, have cytosine-like  $EC_{50}$  for the  $\alpha 4\beta 2$  nAChRs, but  
72 more positive calculated  $\text{LogD}_{\text{pH}7.4}$  values, suggesting greater membrane permeability at the  
73 nearly neutral pH of the blood, brain, and cytoplasm (Blom, Campello, Lester, Gallagher, &  
74 Dougherty, 2019). Estimates of  $\text{LogD}_{\text{pH}7.4}$  are inexact, extrapolated, or rely on algorithmic  
75 calculations whose results differ over two log units for individual molecules (Pienko, Grudzien,  
76 Taciak, & Mazurek, 2016). These estimates have unknown applicability to biological membranes  
77 at the  $\text{LogD}_{\text{pH}7.4}$  values  $< 0$  that characterize varenicline, dianicline, and the cytosine analogs.

78 Secondly, nicotine dependence involves one or more “inside-out” mechanisms. Nicotine itself  
79 ( $\text{logD}_{\text{pH}7.4}$  0.99) enters the endoplasmic reticulum (ER), binds to nascent nAChRs, becomes a  
80 pharmacological chaperone for the nAChRs, and eventually causes selective upregulation of  
81 these receptors on the plasma membrane (PM) (Henderson & Lester, 2015). For this reason, it is  
82 especially important to understand permeation into the ER.

83 These two neuroscience aspects of nicotinic ligands—pharmaceutical science and addiction  
84 science—call for direct measurements of drug movements in living cells. We previously explored  
85 the subcellular pharmacokinetics of nicotine and varenicline in immortalized cell lines and cultured  
86 neurons using the iDrugSnFRs iNicSnFR3a and iNicSnFR3b, to visualize that these nicotinic  
87 agonists enter the ER within seconds of drug application and exit equally rapidly from the ER  
88 upon extracellular washing (Shivange, et al., 2019). That nicotine diffuses across cellular  
89 membranes in seconds has been suspected for decades: nicotine crosses six plasma membranes  
90 to enter the brain within 20 s, providing a “buzz”. That varenicline becomes trapped in acidic  
91 vesicles suggests appreciable membrane permeation but may also underlie unwanted effects  
92 (Govind, et al., 2017; Le Houezec, 2003).

93 We sought to generate and to apply additional intensity-based drug-sensing fluorescent  
94 reporters (“iDrugSnFRs”) for candidate smoking cessation drugs: dianicline, cytosine, 10-

95 fluorocytisine, and 9-bromo-10-ethylcytisine. We hypothesized that a family of newly developed  
96 iDrugSnFRs would enable quantifiable fluorescence signals that compare the differences in  
97 permeation among these compounds.

## 98 RESULTS

### 99 ***Generation of additional nicotinic iDrugSnFRs: structural tactic***

100 To generate iDrugSnFRs for cytisine and dianicline, we followed two converging tactics. In  
101 the “structure-based” tactic, we obtained the first structural data for OpuBC-based SnFRs bound  
102 by nicotinic ligands (nicotine and varenicline) (Fig. 1, Supplementary Table 1). Crystals of  
103 iNicSnFR3adt in the presence of 10 mM nicotine diffracted to 2.95 Å resolution (PDB 7S7U).  
104 Overall, the liganded PBP domain of iNicSnFR3adt adopts a closed conformation (Fig. 1A). In the  
105 binding pocket between the top and bottom lobes of the PBP, we observed an “avocado” shaped  
106 electron density in the nicotine binding site, enclosed by several aromatic residues (Fig. 1B). The  
107 combination of protonation/deprotonation and the rotatable bond of nicotine (Elmore & Dougherty,  
108 2000) vitiate unambiguously localizing it within the binding pocket

109 We obtained an unambiguous ligand placement for iNicSnFR3adt in the presence of 10 mM  
110 varenicline in the same crystallization condition. Crystals of iNicSnFR3adt with varenicline bound  
111 were isomorphous to those of the nicotine-bound crystals and diffracted to 3.2 Å resolution (PDB  
112 7S7T). While the protein structure (Fig. 1D) is identical to that of the nicotine bound structure (Fig.  
113 1A), the rigidity and additional ring of varenicline allowed us to unambiguously localize it in the  
114 binding pocket. Varenicline is enclosed by the same aromatic residues as nicotine, forming cation-  
115  $\pi$  interactions with Tyr65 and Tyr357, in addition to other interactions with the pocket residues  
116 (Fig. 1E).

117 The data confirm that similar ligand-induced conformational changes occur in the periplasmic  
118 binding protein (PBP) for nicotine, varenicline, ACh (Borden, et al., 2019), and choline (Fan, 2020)

119 (Figure 1-figure supplement 1). These changes resemble those for other OpuBC PBPs  
120 (Schiefner, et al., 2004).

121 In the full iDrugSnFR, in the apo state, the Glu78 in linker 1 approaches within ~ 2.5 Å of the  
122 oxygen of the tyrosine fluorophore (Figure 1E1) (PDB 7S7V). Figure 1E2 provides structural  
123 details confirming the hypothesis (Barnett, Hughes, & Drobizhev, 2017; Nasu, Shen, Kramer, &  
124 Campbell, 2021) that in the liganded state, Glu78 has moved away, presumably allowing the  
125 fluorescent tyrosinate to form (Supplementary Video 1). We term this mechanism the “candle  
126 snuffer”.

### 127 ***Generation of additional nicotinic iDrugSnFRs: mutational tactic***

128 In the mutational tactic, we screened each drug shown in Figure 1-figure supplement 2  
129 against a panel of biosensors that included iNicSnFR3a and iNicSnFR3b (Shivange, et al., 2019)  
130 and iAChSnFR (Borden, et al., 2019) as well as intermediate constructs from their development  
131 process. From this screen, we chose sensors with the lowest EC<sub>50</sub> for each drug as our starting  
132 protein for iDrugSnFR evolution.

133 Because the candle snuffer mechanism explains several details of the agonist- and pH-  
134 sensitivity of both iNicSnFR3a and iSketSnFR (see Discussion), we presume that it represents a  
135 general mechanism for OpuBC-cpGFP SnFRs. We did not mutate residues that lie (in 3D space)  
136 between the binding site and linkers.

137 For dianicline and cytisine separately, we incrementally applied site-saturation mutagenesis  
138 (SSM) to first and second shell amino acid positions within the binding pocket. We evaluated each  
139 biosensor and drug partner in lysate from *E. coli* and carried forward the biosensor with the highest  
140 S-slope to the subsequent round. S-slope,  $\frac{\Delta F}{F_0}/[ligand]$  at the beginning of the dose-response  
141 relation, emphasizes the response to ligand concentrations in the pharmacologically relevant  
142 range (Bera, et al., 2019). Table 1 and Fig. 2 summarize dose-response relations for the optimized

143 sensors. The dianiline sensor, iDianiSnFR, has  $EC_{50}$   $6.7 \pm 0.3 \mu\text{M}$ ,  $\Delta F_{\text{max}}/F_0$   $7.4 \pm 0.1$ , and S-  
144 slope 1.1. The cytosine sensor, iCytSnFR, has  $EC_{50}$   $9.4 \pm 0.8 \mu\text{M}$ ,  $\Delta F_{\text{max}}/F_0$   $5.0 \pm 0.2$ , S-slope 0.5  
145 (Table 1, Fig. 2A-B). After generating iCytSnFR, we performed additional SSM to progress from  
146 iCytSnFR to SnFRs for 10-fluorocytosine and 9-bromo-10-ethylcytosine. This optimization gave us  
147 iCyt\_F\_SnFR ( $EC_{50}$   $1.4 \pm 0.04 \mu\text{M}$ ,  $\Delta F_{\text{max}}/F_0$   $7.9 \pm 0.1$ , S-slope 5.6) and iCyt\_BrEt\_SnFR ( $EC_{50}$   
148  $5.7 \pm 0.1 \mu\text{M}$ ,  $\Delta F_{\text{max}}/F_0$   $4.0 \pm 0.03$ , and S-slope 0.7) (Table 1, Fig. 2C-D).

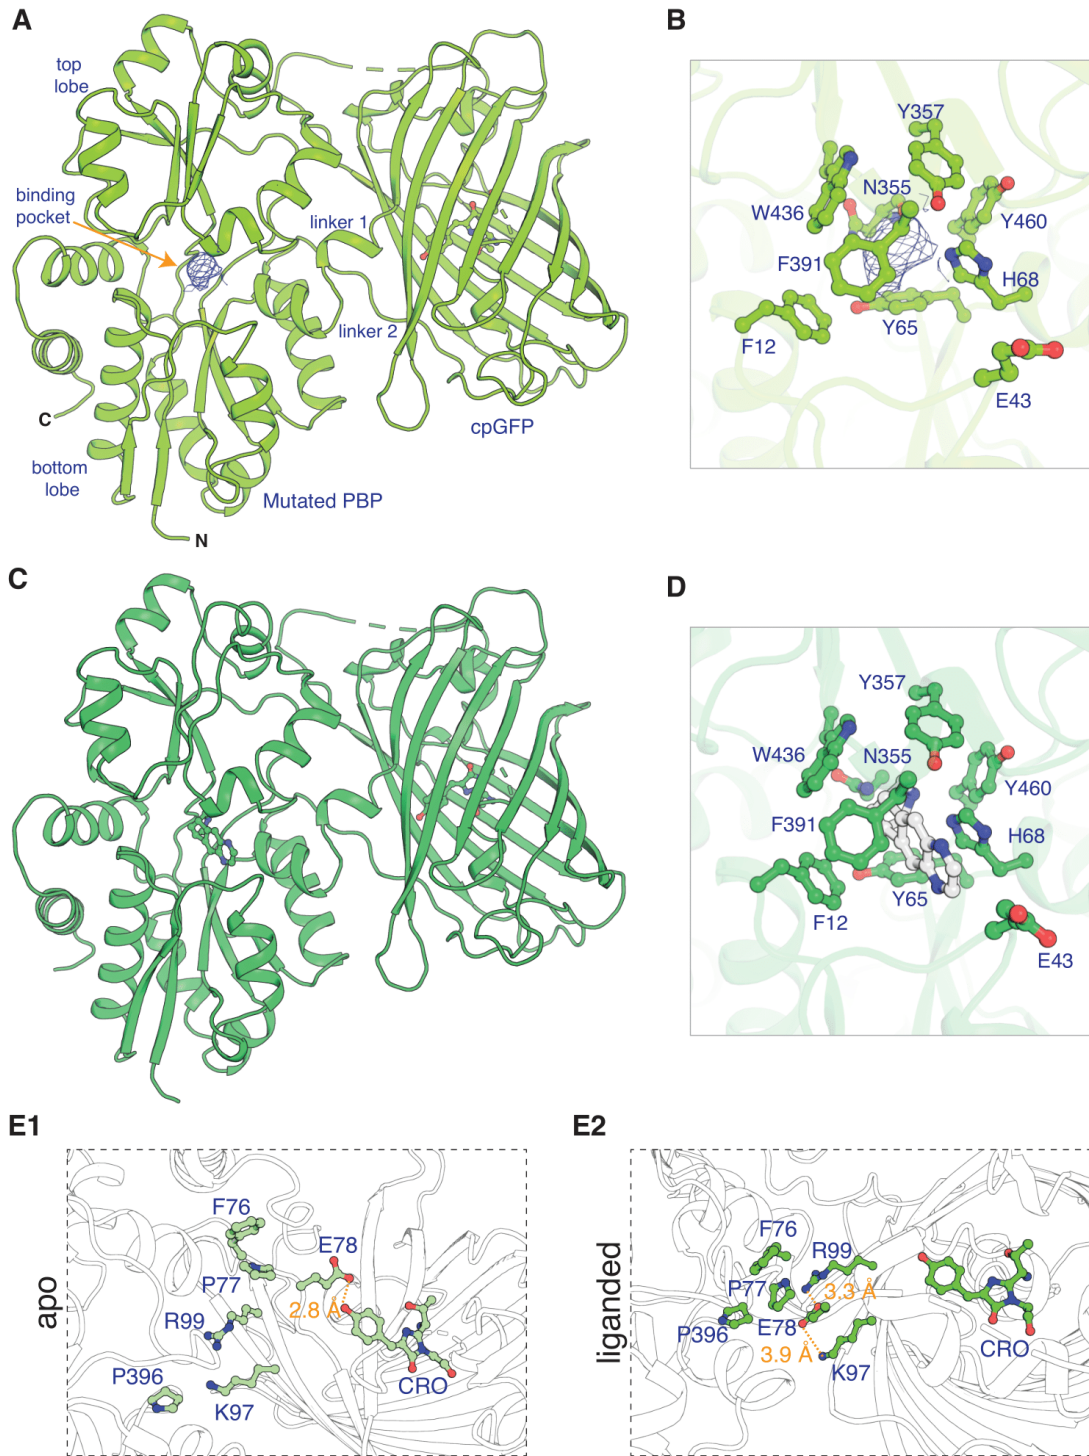

149  
150



151 **Figure 1.** Apo and ligand-bound structures of iNicSnFR3adt (dt indicates that His<sub>6</sub> and Myc tags  
152 have been removed to aid crystallization). To form an iDrugSnFR, a circularly permuted GFP  
153 molecule, flanked by two 4-residue linking sequences, is inserted into a PBP at a position (77-78,  
154 in our numbering system) that changes backbone  $\Phi$ - $\Psi$  angles between the apo and liganded  
155 PBP. **(A)** Overall conformation of iNicSnFR3adt crystallized with nicotine; an electron density  
156 appears at the nicotine binding site (PDB 7S7U). **(B)** iNicSnFR3adt binding site residues. **(C)**  
157 Overall conformation of iNicSnFR3adt with varenicline bound (PDB 7S7T). **(D)** iNicSnFR3adt  
158 binding site with varenicline present. **(E)** Aspects of the PBP-Linker1-cpGFP interface,  
159 emphasizing contacts that change upon ligand binding. The Phe76-Pro77-GluE78 cluster (in  
160 Linker 1) lies 11 to 16 Å from position 43, which defines the outer rim of the ligand site **(B)**;  
161 therefore, the cluster makes no direct contact with the ligand site. **(E1)** In the apo conformation,  
162 Glu78 acts as a candle snuffer that prevents fluorescence by the chromophore (PDB 7S7V). **(E2)**  
163 In the liganded conformation (PDB 7S7T), the Phe76-Pro77-GluE78 cluster moves Glu78 at least  
164 ~ 14 Å away from the fluorophore. Pro77 is flanked by Phe76 and Pro396 (in the top lobe of the  
165 PBP moiety). The presumably deprotonated Glu78 forms salt bridges with Lys 97 and Arg99, both  
166 facing outward on the  $\beta$ 6 strand of the original GFP (within the original Phe165-Lys-Ile-Arg-His  
167 sequence).  
168

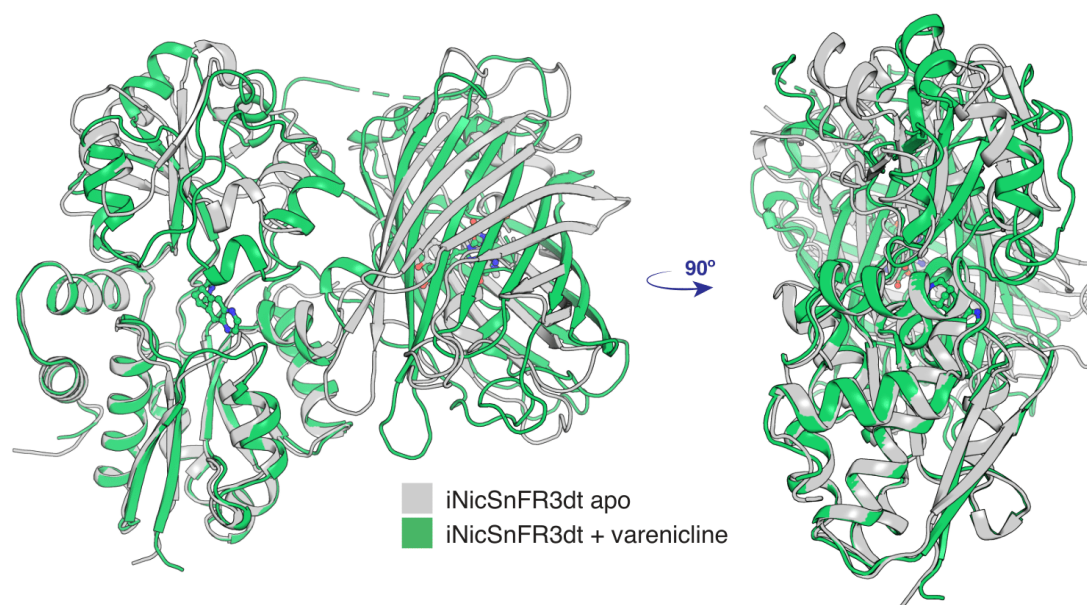

169 **Figure 1-figure supplement 1.** Conformational change of apo (PDB 7S7V) to the liganded,  
170 closed form (PDB 7S7T) of iNicSnFR3adt. The bottom lobe of the PBP is superimposed in the  
171 two conformations. With respect to the bottom lobe, the “Venus flytrap” conformational change  
172 tilts the top lobe of the PBP but does not change its structure (see Supplementary Data). The  
173 conformational change also tilts the cpGFP moiety but does not change its structure.

174  
175

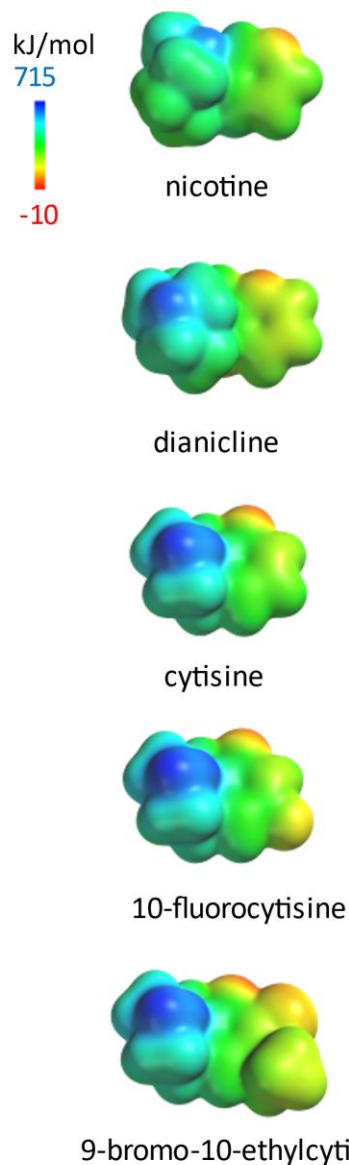

176

177 **Figure 1-figure supplement 2**

178 Electrostatic surface potential densities for the nicotinic agonists in this study, calculated by

179 SPARTAN at HF/6-31G\*\* theory level. The display ranges from -10 to 715 kJ/mol. The

180 molecules are shown on the same distance scale.

181

182 **Table 1.**

| Informal Name  | Drug of interest         | $\Delta F_{\max}/F_0$ |                | $EC_{50}$ ( $\mu\text{M}$ ) |               | S-slope |     | 11 | 43 | 44 | 68 | 324 | 360 | 391 | 395 |
|----------------|--------------------------|-----------------------|----------------|-----------------------------|---------------|---------|-----|----|----|----|----|-----|-----|-----|-----|
|                |                          | L                     | P              | L                           | P             | L       | P   |    |    |    |    |     |     |     |     |
| iNicSnFR3b     | nicotine                 | ND                    | 10             | ND                          | 19            | ND      | 0.5 | E  | E  | N  | H  | S   | T   | F   | G   |
| iDianiSnFR     | dianicline               | $7.4 \pm 0.1$         | $4.7 \pm 0.2$  | $6.7 \pm 0.3$               | $15 \pm 1$    | 1.1     | 0.3 | D  | R  | -  | S  | N   | G   | -   | N   |
| iAChSnFR       | ACh                      | ND                    | 12             | ND                          | 1.3           | ND      | 9.2 | I  | V  | N  | H  | A   | T   | F   | G   |
| iCytSnFR       | cytisine                 | $5.0 \pm 0.2$         | $7.3 \pm 0.4$  | $9.4 \pm 0.8$               | $11 \pm 1$    | 0.5     | 0.7 | -  | Y  | -  | -  | -   | -   | W   | -   |
| iCyt_F_SnFR    | 10-fluorocytisine        | $7.9 \pm 0.1$         | $2.3 \pm 0.1$  | $1.4 \pm 0.04$              | $1.6 \pm 0.3$ | 5.6     | 1.4 | -  | N  | G  | -  | -   | -   | W   | -   |
| iCyt_BrEt_SnFR | 9-bromo-10-ethylcytisine | $4.0 \pm 0.03$        | $3.6 \pm 0.04$ | $5.7 \pm 0.1$               | $4.2 \pm 0.2$ | 0.7     | 0.9 | -  | Q  | G  | -  | -   | -   | W   | -   |

183

184 **Nicotinic agonist iDrugSnFR naming, dose-response relations, and residues mutated.** Measurements in *E. coli* lysates (L) or  
185 with purified protein (P). ND, Not determined. Data for iAChSnFR from (Borden, et al., 2019); Data for iNicSnFR3b from (Shivange, et  
186 al., 2019).

187

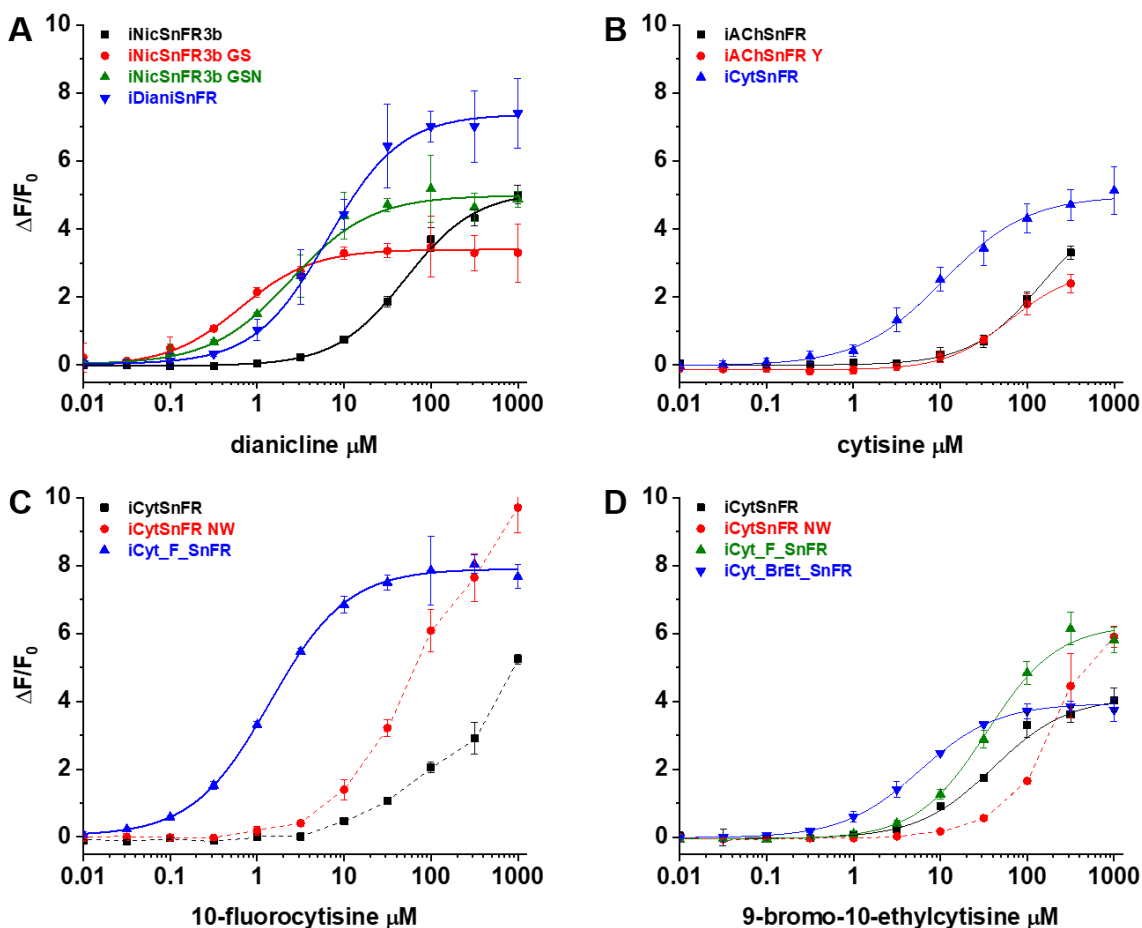

188

189 **Figure 2.** Nicotinic agonist iDrugSnFR development. Dose-response relations on intermediate  
190 constructs using *E. coli* lysate were performed with respective drug partners to identify SSM  
191 winners. **(A-D)** The progenitor biosensor is listed in black. Dashed lines indicate data that did not  
192 reach saturation at the concentrations tested; therefore,  $EC_{50}$  and  $\Delta F_{\text{max}}/F_0$  could not be  
193 determined. Development of **(A)** iDianiSnFR, **(B)** iCytSnFR, **(C)** iCyt\_F\_SnFR, and **(D)**  
194 iCyt\_BrEt\_SnFR.

195

196

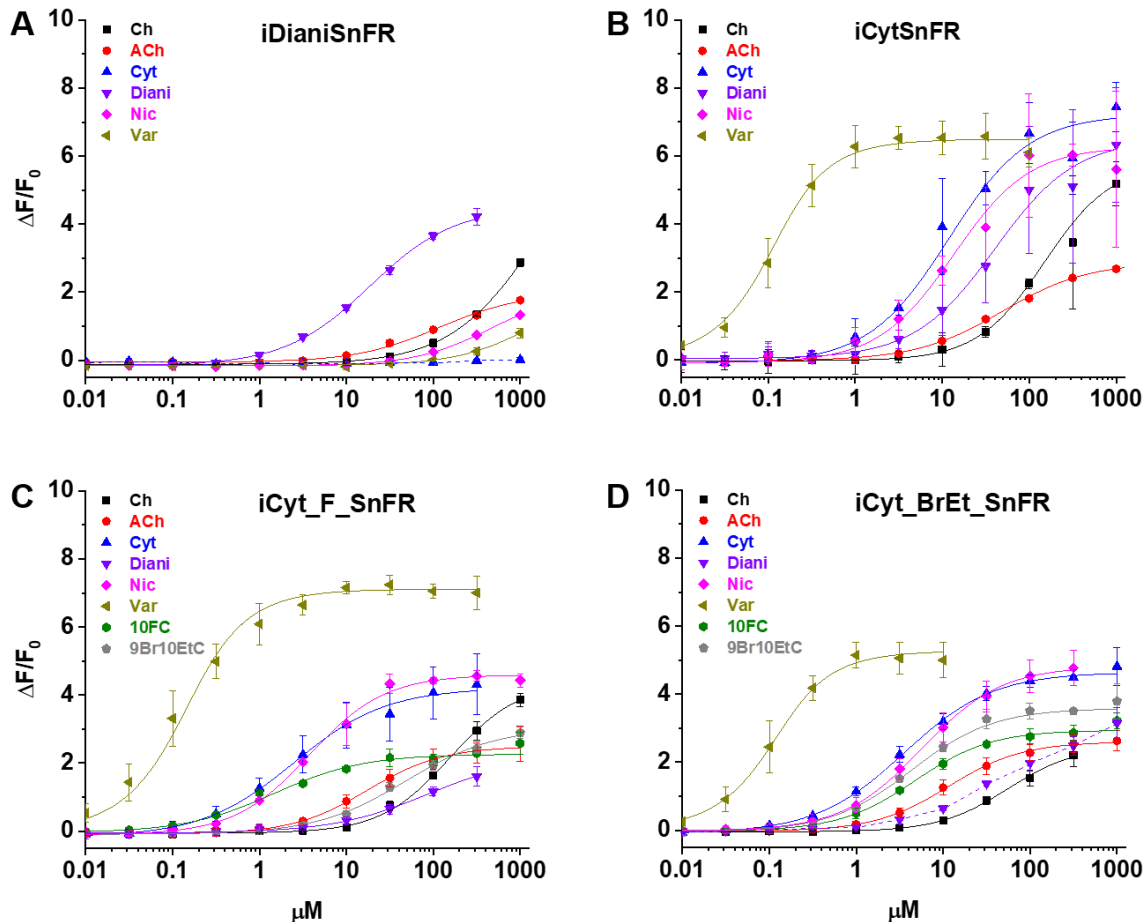

197

198 **Figure 3.** Dose-response relations of iDrugSnFR protein versus a nicotinic agonist panel.

199 Abbreviations: Ch (choline), ACh (acetylcholine), Cyt (cytisine), Diani (dianicline), Nic (nicotine),

200 Var (varenicline), 10FC (10-fluorocytisine), and 9Br10EtC (9-bromo-10-ethyl-cytisine). **(A-D)**

201 Relevant  $EC_{50}$  values for each iDrugSnFR are listed in Table 2. Dashed lines indicate dose-

202 response relations that did not approach saturation for the concentration ranges tested; therefore,

203  $EC_{50}$  and  $\Delta F_{\text{max}}/F_0$  could not be determined. **(A)** iDianiSnFR shows preference for dianicline, with

204 some promiscuity for other nicotinic agonists. **(B)** iCytSnFR, **(C)** iCyt\_F\_SnFR, and **(D)**

205 iCyt\_BrEt\_SnFR bind their drug partner, but also respond to other nicotinic agonists.

206  
207

**Table 2.**

| Drug Name                | iDianiSnFR           |                             |         | iCytSnFR             |                             |         | iCyt_F_SnFR          |                             |         | iCyt_BrEt_SnFR       |                             |         |
|--------------------------|----------------------|-----------------------------|---------|----------------------|-----------------------------|---------|----------------------|-----------------------------|---------|----------------------|-----------------------------|---------|
|                          | $\Delta F_{max}/F_0$ | EC <sub>50</sub> ( $\mu$ M) | S-slope | $\Delta F_{max}/F_0$ | EC <sub>50</sub> ( $\mu$ M) | S-slope | $\Delta F_{max}/F_0$ | EC <sub>50</sub> ( $\mu$ M) | S-slope | $\Delta F_{max}/F_0$ | EC <sub>50</sub> ( $\mu$ M) | S-slope |
| choline                  | 2.0 ± 0.1            | 84 ± 20                     | <0.1    | 5.8 ± 0.2            | 240 ± 30                    | <0.1    | 2.6 ± 0.1            | 18 ± 1                      | 0.1     | 2.6 ± 0.1            | 12 ± 1                      | 0.2     |
| acetylcholine            | 7.4 ± 1.0            | 660 ± 80                    | <0.1    | 2.9 ± 0.1            | 35 ± 3                      | <0.1    | 4.4 ± 0.3            | 222 ± 50                    | <0.1    | 2.5 ± 0.2            | 73 ± 6                      | <0.1    |
| cytisine                 | -                    | -                           | <0.1*   | 7.3 ± 0.4            | 11 ± 1                      | 0.7     | 4.4 ± 0.1            | 2.6 ± 0.3                   | 1.7     | 4.7 ± 0.1            | 3.5 ± 0.2                   | 1.3     |
| dianicline               | 4.7 ± 0.2            | 15 ± 1                      | 0.3     | 6.5 ± 0.4            | 34 ± 4                      | 0.2     | 2.3 ± 0.3            | 43 ± 6                      | <0.1    | 4-6                  | >100                        | <0.1**  |
| nicotine                 | 2.2 ± 0.1            | 440 ± 100                   | <0.1    | 6.4 ± 0.2            | 14 ± 2                      | 0.5     | 4.7 ± 0.1            | 3.8 ± 0.2                   | 1.2     | 4.8 ± 0.1            | 5.5 ± 0.2                   | 0.9     |
| varenicline              | 2.4 ± 2.0            | 1200 ± 500                  | <0.1    | 6.5 ± 0.1            | 0.06 ± 0.01                 | 110     | 7.1 ± 0.2            | 0.09 ± 0.02                 | 79      | 5.3 ± 0.1            | 0.06 ± 0.01                 | 88      |
| 10-fluorocytisine        | ND                   | ND                          | ND      | ND                   | ND                          | ND      | 2.3 ± 0.1            | 1.6 ± 0.3                   | 1.4     | 3.0 ± 0.1            | 4.7 ± 0.3                   | 0.6     |
| 9-bromo-10-ethylcytisine | ND                   | ND                          | ND      | ND                   | ND                          | ND      | 3.1 ± 0.1            | 31 ± 2                      | 0.1     | 3.6 ± <0.1           | 4.2 ± 0.2                   | 0.9     |

208

209 **iDrugSnFR dose-response relations versus a selected panel of nicotinic agonists.** ND, Not determined. \* , \*\* EC<sub>50</sub> and  $\Delta F_{max}/F_0$   
 210 could not be determined from the data (Fig. 3). Therefore, the upper limit to the S-slope is estimated from the data at the foot of the  
 211 dose-response relation.

212

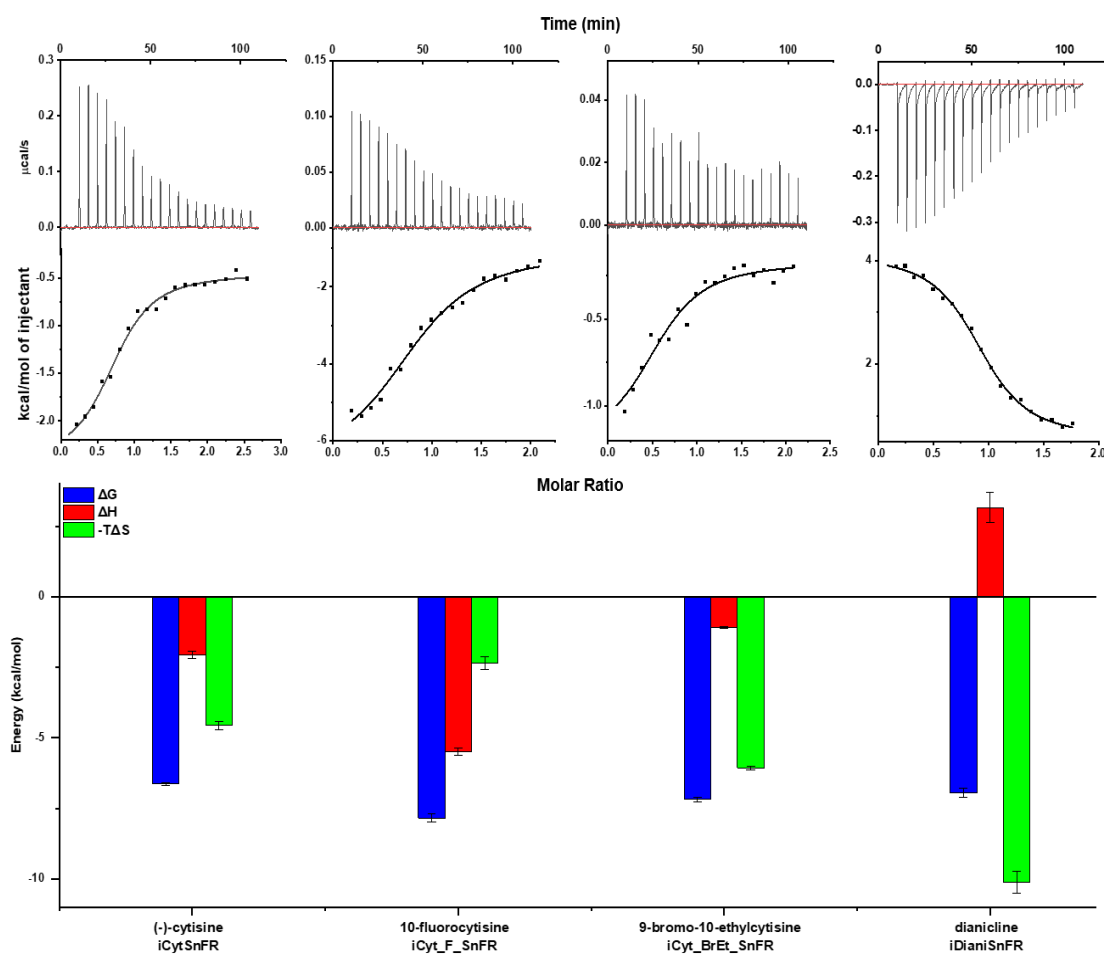

213

214 **Figure 4.** Isothermal titration calorimetry traces, fits, and thermodynamic data. **Top row:**

215 Exemplar heat traces of iCytSnFR, iCyt\_F\_SnFR, iCyt\_BrEt\_SnFR, and iDianiSnFR paired with

216 their drug partners obtained by isothermal calorimetry. The heats for iCytSnFR, iCyt\_F\_SnFR,

217 and iCyt\_BrEt\_SnFR were exothermic, while that for iDianiSnFR was endothermic. **Middle row:**

218 The resulting fits for each iDrugSnFR:drug pair from the integrated heats comprising each series

219 of injections. **Bottom row:** Energy calculations. All iDrugSnFRs show exergonic reactions, but

220 the relative enthalpic and entropic contributions vary among iDrugSnFRs. Data are from 3

221 separate runs, Mean  $\pm$  SEM.



222 **Table 3.**

| <b>Biosensor</b>      | <b>K<sub>D</sub> (μM)</b> | <b>n</b>           | <b>ΔH (kcal/mol)</b> | <b>-TΔS (kcal/mol)</b> | <b>ΔG (kcal/mol)</b> |
|-----------------------|---------------------------|--------------------|----------------------|------------------------|----------------------|
| <b>iCytSnFR</b>       | <b>13.7 ± 1.1</b>         | <b>0.84 ± 0.05</b> | <b>-2.1 ± 0.1</b>    | <b>-4.6 ± 0.2</b>      | <b>-6.6 ± 0.1</b>    |
| <b>iCyt_F_SnFR</b>    | <b>1.8 ± 0.5</b>          | <b>0.83 ± 0.02</b> | <b>-5.5 ± 0.1</b>    | <b>-2.4 ± 0.2</b>      | <b>-7.9 ± 0.1</b>    |
| <b>iCyt_BrEt_SnFR</b> | <b>5.4 ± 0.8</b>          | <b>0.69 ± 0.09</b> | <b>-1.12 ± 0.03</b>  | <b>6.1 ± 0.1</b>       | <b>-7.2 ± 0.1</b>    |
| <b>iDianiSnFR</b>     | <b>7.6 ± 1.4</b>          | <b>0.92 ± 0.02</b> | <b>3.2 ± 0.5</b>     | <b>10.1 ± 0.4</b>      | <b>-7.0 ± 0.2</b>    |

223  
224 **Affinity, occupancy number, and thermodynamic data calculated from isothermal titration**  
225 **calorimetry.** Data are the mean ± SEM, n = 3 runs.

226  
227

228

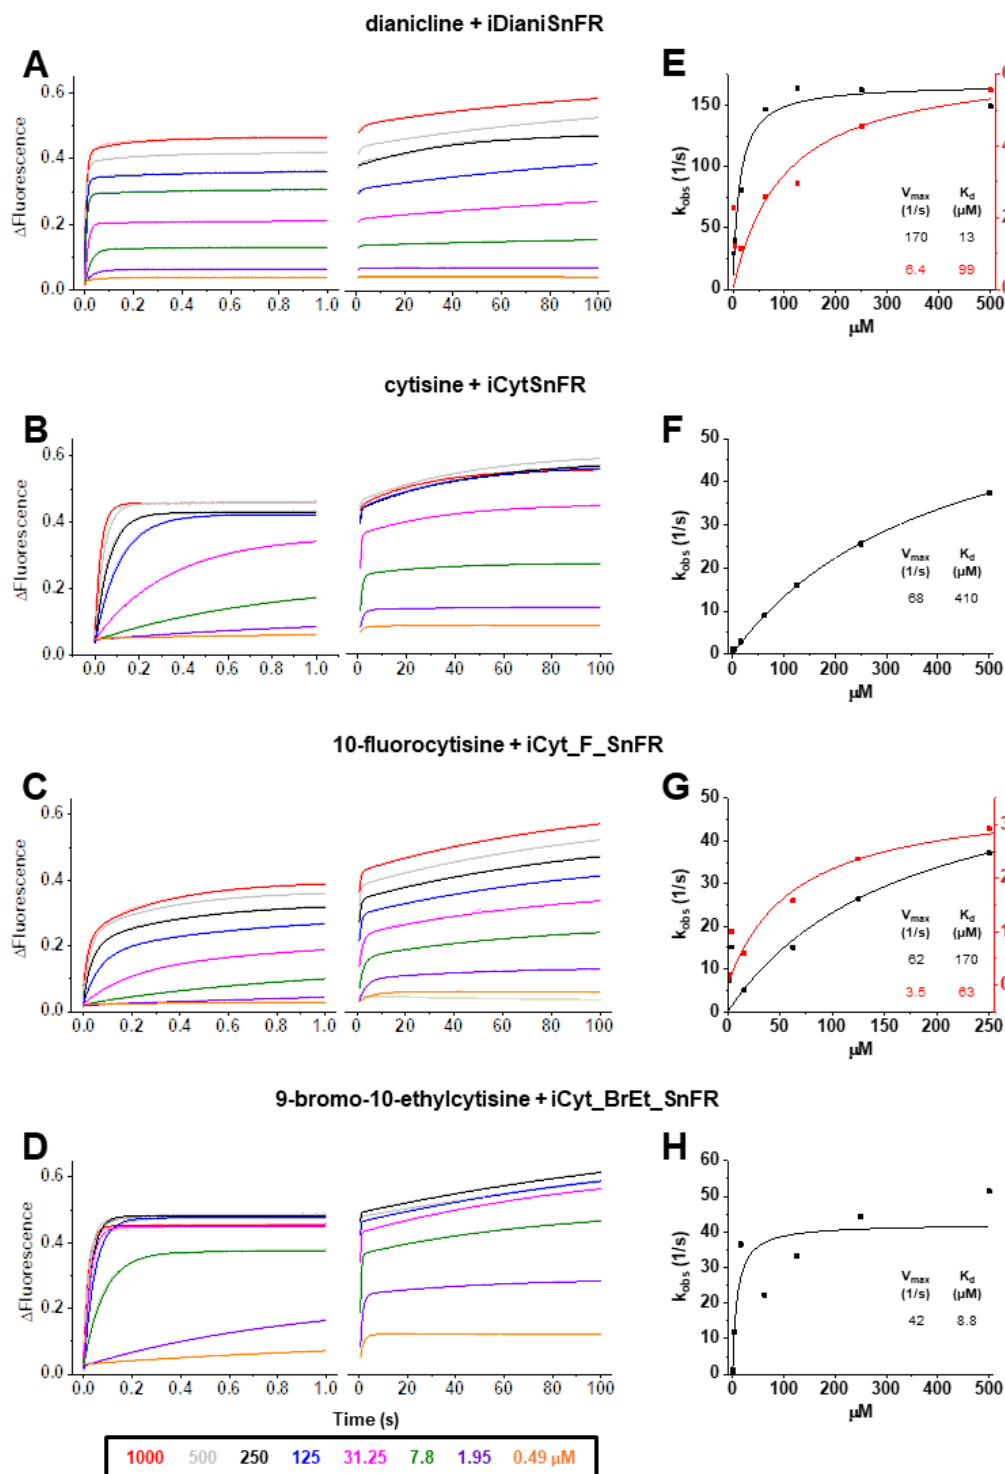

229  
 230 **Figure 5.** Stopped-flow fluorescence kinetic data for **(A)** iDianiSnFR, **(B)** iCytSnFR, **(C)**  
 231 iCyt\_F\_SnFR, and **(D)** iCyt\_BrEt\_SnFR over 1 s and 100 s. Fluorescence was activated by mixing  
 232 with the agonists as noted. Stopped-flow data shows a departure from first-order kinetics for this  
 233 set of iDrugSnFRs. iDianiSnFR and iCyt\_F\_SnFR are fit to a double exponential; iCytSnFR and

234 iCyt\_BrEt\_SnFR are fit to a single exponential. **(E-H)** Plots of the observed apparent rate constant  
235 against [agonist] for the 1 s data obtained in **(A-D)**.  
236

## 237 **Specificity and thermodynamics of nicotinic iDrugSnFRs**

238 We characterized the specificity of purified iDrugSnFRs for their drug partners versus a  
239 panel of related nicotinic agonists (Table 2, Fig. 3). The newly developed iDrugSnFRs showed  
240 some sensitivity to related nicotinic agonists. iDianiSnFR had the greatest fidelity for its drug  
241 partner but also showed an increased  $EC_{50}$  (15  $\mu$ M) as a purified protein versus its  $EC_{50}$  in lysate  
242 (6.7  $\mu$ M), possibly indicating decreased stability in a purified form. iCytSnFR, iCyt\_F\_SnFR, and  
243 iCyt\_BrEt\_SnFR showed a greater level of promiscuity for the compounds comprising the nicotinic  
244 agonist panel. Of note, iCytSnFR, iCyt\_F\_SnFR, and iCyt\_BrEt\_SnFR have an exceptionally low  
245 (60–90 nM)  $EC_{50}$  for varenicline. The newly developed iDrugSnFRs showed negligible binding to  
246 choline or the neurotransmitter acetylcholine, leading one to expect minimal endogenous  
247 interference during future *in vivo* experiments.

248 We also performed dose-response experiments with iDianiSnFR, iCytSnFR,  
249 iCyt\_F\_SnFR, and iCyt\_BrEt\_SnFR against a panel of nine endogenous molecules, including  
250 neurotransmitters (Supplementary Fig. 1). iDianiSnFR showed no response to any of the nine  
251 selected compounds above background. iCytSnFR, iCyt\_F\_SnFR, and iCyt\_BrEt\_SnFR showed  
252 no response above background for seven of the compounds. However, they exhibited a  $\Delta F/F_0$  of  
253 0.25–0.8 to dopamine at 316  $\mu$ M/1 mM and a  $\Delta F/F_0$  of 0.8–1.5 to serotonin (5-HT) at 316  $\mu$ M/1  
254 mM. In terms of S-slope, the relevant metric for most cellular or *in vivo* experiments, the SnFRs  
255 are at least 250-fold more sensitive to their eponymous partners than to other molecules we have  
256 tested.

257 To examine the thermodynamics of the iDrugSnFR:drug interaction, we conducted  
258 isothermal titration calorimetry (ITC) binding experiments (Fig. 4). The experimentally determined  
259  $K_D$  of each iDrugSnFR:drug pair using ITC was within a 1.5 factor of the experimentally  
260 determined  $EC_{50}$  for fluorescence in *E. coli* lysate or purified protein (Table 3). We infer that the  
261  $EC_{50}$  for fluorescence is dominated by the overall binding of the ligand for all the iDrugSnFRs.

## 262 ***Kinetics of nicotinic agonist iDrugSnFRs: stopped-flow***

263 In a stopped-flow apparatus, we measured the fluorescence changes of iDrugSnFRs with  
264 millisecond resolution during both multiple 1 s trials and an independent 100 s trial. The stopped-  
265 flow data revealed that iDrugSnFRs do not have pseudo-first-order kinetic behaviors typical of  
266 two state binding interactions. Time courses of iDianiSnFR (both over 1 s and 100 s) were best  
267 fitted by double exponential equations. Most of the fluorescence change occurs within the first 0.1  
268 s of mixing (Fig. 5A), with only minor additional increase by 100 s.

269 Changes in fluorescence from iCytSnFR during the first 1 s of mixing fit well to a single  
270 exponential (Fig. 5B), and have close to pseudo-first order kinetics (i.e. the observed rate of  
271 fluorescence change is nearly linear with drug concentration). As with iDianiSnFR, most of the  
272 fluorescence change occurs within the first second, with additional fluorescent increase continuing  
273 over the next minute (Fig. 5B, right panel).

274 Like iDianiSnFR, iCyt\_F\_SnFR fluorescence changes are best fit by a double exponential  
275 (Fig. 5C), but the time course of fluorescence change is significantly slower. Fluorescence  
276 gradually increases throughout the recording period and beyond. This information was considered  
277 in later *in vitro* and *ex vivo* experiments.

278 iCyt\_BrEt\_SnFR fits well to a single exponential (Fig. 5D) for the first 1 s of data collection,  
279 but like the other sensors, continues to increase its fluorescence over longer periods.

280 We plotted the  $k_{\text{obs}}$  ( $\text{s}^{-1}$ ) obtained in the 1 s stopped-flow experiments versus concentration  
281 (Fig. 5E-5H). The aberrations from an ideal first-order kinetics vitiate generation of definitive  $k_{\text{off}}$   
282 and  $k_{\text{on}}$  values (Supplementary Table 2), but we can approximate a  $K_{\text{max}}$  and  $K_{\text{D}}$  from our fitting  
283 procedures. Our stopped-flow experiments reinforced previous observations (Unger, et al., 2020)  
284 that the kinetics of iDrugSnFR binding involve complexities beyond a simple first-order kinetic  
285 model governing two binding partners.

## 286 ***Kinetics of nicotinic agonist iDrugSnFRs: millisecond microperfusion***

287 We also studied iCytSnFR\_PM expressed in HEK293T cells during fluorescence responses  
288 to ACh, cytosine, or varenicline in a microperfusion apparatus that exchanged solutions near the  
289 cell on a millisecond time scale (Methods). This system directly measures the decay of the  
290 response when ligand is suddenly removed. The rank order of the iCytSnFR steady-state  
291 sensitivities is varenicline > cytosine > ACh. The time constant for decay decreased with increasing  
292 steady-state EC<sub>50</sub> of the ligands, as though more tightly binding ligands dissociate more slowly  
293 (Fig. 6A).

294 We measured the decay waveforms after drug pulses at concentrations  $\geq$  the EC<sub>50</sub> of the  
295 steady-state response to maximize the  $\Delta F/F_0$  signal/noise ratio (Fig. 6A-D). Because the decay  
296 phases are measured in zero [ligand], one expects that the decay rate constant(s) ( $k_{off}$ ) for an  
297 iDrugSnFR do not depend on the pulsed ligand concentration. Decay of the ACh response  
298 followed a single exponential time course (Fig. 6B). The values of the  $k_{off}$  for 30, 100, and 200  $\mu$ M  
299 ACh did not differ significantly (ANOVA,  $p = 0.62$ , degrees of freedom ( $df$ ) = 2 (model), 20 (error)).  
300 We pooled them to obtain a mean  $k_{off}$  of  $1.9 \pm 0.1 \text{ s}^{-1}$  (mean  $\pm$  SEM,  $n = 23$  areas (50 cells)). The  
301 corresponding time constant  $\tau_{off}$  was  $530 \pm 30 \text{ ms}$ . Hence, the temporal resolution of the  
302 CytSnFR\_PM sensor for changes in the ACh concentration was in the sub-second range.

303 The decay of the cytosine and varenicline response was biphasic (Fig. 6C-D): two exponential  
304 decay terms with an additional constant component fitted the cytosine decay significantly better  
305 than a single exponential term (F-test,  $p < 0.05$ ). As expected, neither the faster decay rate  
306 constants ( $k_{f_{off}}$ ) (ANOVA,  $p = 0.30$ ,  $df = 3,32$ ) nor the slower decay rate constants ( $k_{s_{off}}$ ) (ANOVA,  
307  $p = 0.54$ ,  $df = 3,31$ ) differed among the tested cytosine concentrations (5-15  $\mu$ M). The  $k_{f_{off}}$  and  $k_{s_{off}}$   
308 for 5-15  $\mu$ M cytosine were  $0.61 \pm 0.04 \text{ s}^{-1}$  ( $n = 36$  areas, 105 cells) and  $0.146 \pm 0.006 \text{ s}^{-1}$  ( $n = 35$   
309 areas,  $n = 103$  cells), respectively. The corresponding decay time constants ( $\tau_{f_{off}}$ ,  $\tau_{s_{off}}$ ) were  $1.8 \pm$   
310  $0.1 \text{ s}$  and  $6.9 \pm 0.2 \text{ s}$ . Therefore, the temporal resolution of CytSnFR\_PM sensor for cytosine was  
311  $< 10 \text{ s}$ , adequate for the temporal resolution of the live-cell experiments presented below.

312            Interestingly, the decay waveform of the varenicline response was much slower than that for  
313            cytosine or ACh (Fig. 6A, 6D). We pulsed 2  $\mu$ M varenicline,  $\gg$  the  $EC_{50}$  of the steady-state  
314            response of the isolated protein ( $60 \pm 10$  nM) (Fig. 6D). The values of the  $k_{off}$  and  $k_{s_{off}}$  were  $0.9$   
315             $\pm 0.2$   $s^{-1}$  and  $0.0065 \pm 0.0002$   $s^{-1}$ , respectively ( $n= 4$  areas (9 cells)). The slower component  
316            dominated the decay phase, with a fractional amplitude of  $85 \pm 1\%$ . Thus, the temporal resolution  
317            of the iCytSnFR\_PM sensor for varenicline was in the minute range. In the live-cell experiments  
318            described below, it would not be possible to resolve the differences between varenicline at the  
319            PM and in the ER. The relatively high affinity of iCytisineSnFR for varenicline, which presumably  
320            arises in part from the increased lifetime of the varenicline-iDrugSnFR complex, has drawbacks.  
321            The temporal resolution of iNicSnFR3a and iNicSnFR3b, which bind varenicline  $\sim 100$ -fold less  
322            tightly, is appropriate for subcellular experiments (Shivange, et al., 2019). The previous  
323            experiments showing ER entry of varenicline used iNicSnFR3a and iNicSnFR3b (Shivange, et  
324            al., 2019). For additional microperfusion data and analyses see Supplementary Figures 2-4.

325

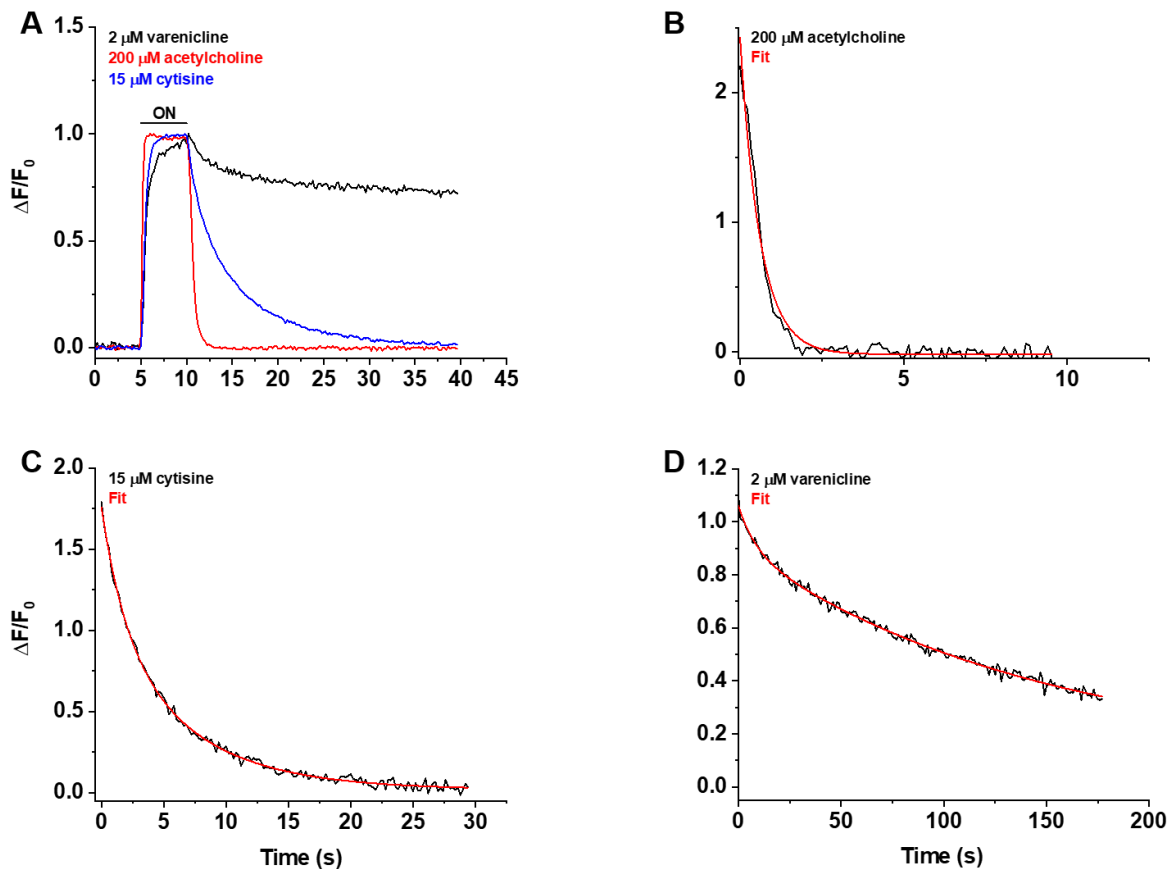

326 **Figure 6.** Decay of the iCytSnFR<sub>PM</sub> responses after removal of ACh, cytosine, or varenicline.  
327 **(A)** The red, blue, and black traces are mean  $\Delta F/F_0$  values for the ACh (200  $\mu\text{M}$ ), cytosine (15  
328  $\mu\text{M}$ ), and varenicline (2  $\mu\text{M}$ ) responses as a function of time ( $n = 4-10$  areas per ligand). The  $\Delta F/F_0$   
329 was normalized to the peak response for each ligand. Sampling rate was 5 frames/s. Ligand was  
330 applied for 5 s, denoted by the green horizontal bar above the traces. **(B-D)** Examples of the  
331 decay phase of the response to ACh (200  $\mu\text{M}$ ), cytosine (15  $\mu\text{M}$ ), and varenicline (2  $\mu\text{M}$ ) in  
332 individual areas (black traces in each panel). Red lines are fits to the sum of one or two negative  
333 exponential terms and a constant (red lines in each panel) using non-linear least-squares  
334 regression. **(B)** The decay of the ACh (200  $\mu\text{M}$ ) response ( $n = 1$  area, 3 cells) was monophasic  
335 with a single time constant ( $\tau_{\text{Off}}$ ) of  $0.61 \pm 0.02$  s ( $\pm$  SE,  $n = 86$  frames, sampling rate of 9.8  
336 frames/s). The red line is a fit to the sum of a negative exponential component ( $R^2$  of 0.98). **(C)**  
337 The decay of the cytosine (15  $\mu\text{M}$ ) response ( $n = 1$  area, 4 cells) was biphasic with time constants



338 ( $\tau f_{off}$ ,  $\tau s_{off}$ ) of  $1.9 \pm 0.2$  and  $6.6 \pm 0.5$  s ( $n = 149$  frames, sampling rate of 5 frames/s). The red line  
339 is a fit to the sum of two negative exponential components and a constant ( $R^2$  of 0.996). It was  
340 significantly better than that of the sum of a single negative exponential term and a constant (F-  
341 test,  $p < 0.05$ ). The relative amplitude of the slower decay component ( $A_s/(A_s+A_f)$ ; where  $A_s$  is  
342 amplitude of the slower component of decay in units of  $\Delta F/F_0$  and  $A_f$  is amplitude of the faster  
343 component) was 61%. **(D)** The decay of the varenicline ( $2 \mu\text{M}$ ) response ( $n = 1$  area, 3 cells) was  
344 also biphasic with a  $\tau f_{off}$  and  $\tau s_{off}$  of  $9 \pm 1$  s and  $150 \pm 10$  s ( $n = 178$  frames, sampling rate of 1  
345 frame/s), respectively. The  $A_s/(A_s+A_f)$  was 83%. The red line is a fit to the sum of two negative  
346 exponential terms and a constant ( $R^2$  of 0.994) and it was significantly better than that to the sum  
347 of a single negative exponential term and a constant (F-test,  $p < 0.05$ ).  
348

349 ***Characterization of nicotinic iDrugSnFRS in HeLa cells and primary mouse hippocampal***  
350 ***culture***

351 We examined the subcellular pharmacokinetics of the nicotinic agonists in mammalian cell  
352 lines and primary mouse hippocampal neurons. The nicotinic iDrugSnFRs were targeted to the  
353 plasma membrane (PM) (iDrugSnFR\_PM) or the endoplasmic reticulum (ER) (iDrugSnFR\_ER)  
354 as previously described (Bera, et al., 2019; Shivange, et al., 2019). We then performed a dose-  
355 response experiment using wide-field fluorescence imaging with each iDrugSnFR and its drug  
356 partner, sampling a range of concentrations covering a log scale surrounding the EC<sub>50</sub> as  
357 determined for the purified protein (Fig. 7, Fig. 8, Supplementary Videos 2-5).

358 iDianiSnFR showed a robust response to dianicline at the PM and the ER in HeLa cells across  
359 a range of concentrations (3.125–100 μM) and the speed was nearly limited by solution  
360 exchanges; there was a clear return to baseline fluorescence upon washout on the order of  
361 seconds after each drug application. At 100 μM, the PM and ER have a  $\Delta F/F_0$  of ~1.2, but at lower  
362 concentrations, the ER displayed 30–75% of the signal detected at the PM, which may indicate a  
363 difference in membrane crossing (Fig. 7A). Imaging in primary mouse hippocampal neurons  
364 demonstrated a similar trend (Fig. 8A).

365 Cytisine showed slower entry into and exit from the ER of HeLa cells. The iCytSnFR\_PM  
366 construct detected cytisine at concentrations from 0.078–80 μM and demonstrated a return to  
367 baseline fluorescence upon washout on the order of seconds after each drug application, reaching  
368 a maximum  $\Delta F/F_0$  of ~2 at concentrations above 5 μM (Fig. 7B). In contrast to the \_PM construct,  
369 the iCytSnFR\_ER construct only detected cytisine with a  $\Delta F/F_0$  above the buffer control in the  
370 range of concentrations from 1.25–80 μM with a  $\Delta F/F_0$  which was 25–50% of the maximum  $\Delta F/F_0$   
371 detected at the PM. Additionally, in the range of detectable concentrations of cytisine, the washout  
372 of cytisine was much slower than solution changes (Fig. 7B). The incomplete washout persists

373 even after several minutes and corresponds with previous suggestions that cytosine has low  
374 membrane permeability, as evidenced by its low brain penetration (Rollema, et al., 2010).

375 In primary mouse hippocampal neurons, iCytSnFR detection of cytosine exhibited the same  
376 kinetic trends seen in HeLa cell experiments (Fig. 8B). During cytosine application (60 s) from  
377 0.078-80  $\mu\text{M}$ , the iCytSnFR<sub>PM</sub> fluorescence nearly reached a plateau, and during the washout  
378 (90-180 s), the fluorescence decayed back to baseline, though the decay slowed after removal of  
379 higher [cytosine]. The <sub>PM</sub> construct reached a maximum  $\Delta F/F_0$  of  $\sim 1.25$  at 80  $\mu\text{M}$ , which was  
380 approximately 60% of the signal observed in HeLa cell experiments (Fig. 8B). The iCytSnFR<sub>ER</sub>  
381 detection of cytosine in the ER reflected the trends seen in HeLa cells, with incomplete cytosine  
382 wash-in phases and prolonged cytosine washout phases. One observable difference was that the  
383 maximum  $\Delta F/F_0$  ( $\sim 1.25$ ) of iCytSnFR<sub>ER</sub> reached a similar maximum to that of iCytSnFR<sub>PM</sub> in  
384 neurons, which was not observed in HeLa cell experiments (Fig 7B).

385 In preliminary HeLa cell experiments with varenicline applied to iCytSnFR, we found much  
386 slower kinetics that differed little between the <sub>ER</sub> and <sub>PM</sub> constructs (data not shown). These  
387 findings, which vitiated the use of the iCytSnFR:varenicline pair in the cellular experiments, are  
388 consistent with the markedly slow kinetics of varenicline-iCytSnFR interactions in the  
389 microperfusion experiments (see above).

390 iCyt<sub>F</sub>SnFR targeted to the PM and ER showed characteristics similar to iCytSnFR in HeLa  
391 cells. The <sub>PM</sub> construct detected 10-fluorocytosine across a range of concentrations with a return  
392 to baseline fluorescence between applications, while the <sub>ER</sub> construct detected 10-fluorocytosine  
393 with  $\Delta F/F_0$  values that were only 25–33% of those detected at the PM (Fig. 7C). Similar to the  
394 iCytSnFR<sub>ER</sub> detection of cytosine, the iCyt<sub>F</sub>SnFR<sub>ER</sub> detection of 10-fluorocytosine was  
395 much slower than solution changes and did not return to baseline between applications, though  
396 the washout occurs on the order of minutes, rather than tens of minutes as with iCytSnFR<sub>ER</sub>  
397 (Fig. 7C). The difference in PM and ER detection of 10-fluorocytosine again shows decreased  
398 membrane permeability into HeLa cells compared to other drugs we have examined with other

399 iDrugSnFRs. Overall, the detection of 10-fluorocytisine with iCyt\_F\_SnFR in primary hippocampal  
400 culture resembled our data with iCyt\_F\_SnFR in HeLa cells. Nevertheless, there were distinct  
401 differences (Fig. 8C), such as a decreased maximum  $\Delta F/F_0$  in the iCyt\_F\_SnFR\_PM construct  
402 and a similar maximum  $\Delta F/F_0$  of  $\sim 1$  for both the \_ER and \_PM constructs. Additionally, the decay  
403 of the iCyt\_F\_SnFR responses lasted tens of minutes, resembling the iCytSnFR\_ER data in  
404 primary hippocampal culture.

405 9-bromo-10-ethylcytisine showed a kinetic profile resembling dianicline.  
406 iCyt\_BrEt\_SnFR\_PM responses to 9-bromo-10-ethylcytisine (0.1–31.6  $\mu\text{M}$ ) were nearly limited  
407 by solution exchanges with a return to baseline fluorescence on the order of seconds, and a  
408 maximum  $\Delta F/F_0$  of  $\sim 1.5$  at 31.6  $\mu\text{M}$ . iCyt\_BrEt\_SnFR\_ER also detected 9-bromo-10-ethylcytisine  
409 over this range of concentrations and returned to baseline fluorescence between applications  
410 (Fig. 7D).  $\Delta F/F_0$  values for iCyt\_BrEt\_SnFR\_ER were 50–75% of the  $\Delta F/F_0$  values detected by  
411 iCyt\_BrEt\_SnFR\_PM, which indicated that 9-bromo-10-ethylcytisine crossed into and out of cells  
412 readily (Fig. 7D). Imaging in primary mouse hippocampal neurons revealed the same trend (Fig.  
413 8D).

414 To more fully examine the membrane-crossing properties of the nicotinic agonists, we  
415 recorded the fluorescence waveforms for several drugs at concentrations between 0.1–3.16  $\mu\text{M}$   
416 with much longer application times and washout times than in the above experiments  
417 (Supplementary Fig. 5). With these conditions, the fluorescence signals suggested complete  
418 washout of each nicotinic agonist from the ER of HeLa cells. However, it is noteworthy that even  
419 when applied at concentrations as low as 0.1  $\mu\text{M}$  and 0.316  $\mu\text{M}$ , cytisine and 10-fluorocytisine  
420 require washout times of several min from the ER. In contrast, the iDrugSnFR localized to the PM  
421 shows a rapid return to baseline after drug application.

422 Because the data of Fig. 7B and Fig. 8B indicated that iCytSnFR\_PM functions as expected  
423 from stopped-flow and millisecond perfusion, we applied additional experiments to ensure that  
424 our observations of drug entry and exit from the ER were not the result of idiosyncratic biosensor

425 function or folding in the ER. iCytSnFR and iCyt\_F\_SnFR both bind nicotine in the same  
426 concentration range as cytosine (though with lower  $\Delta F/F_0$ ). After transfection of \_PM and \_ER  
427 constructs for each sensor into HeLa cells, we performed time-resolved imaging for pulses of 0.1-  
428 31.6  $\mu\text{M}$  nicotine (Fig. 7-figure supplement 2). These nicotine waveforms resembled those already  
429 published with iNicSnFR3a and iNicSnFR3b (Shivange, et al., 2019), confirming that  
430 iCytSnFR\_ER functions as expected with a more permeant nicotinic drug. Thus, the slower  
431 kinetics for iCytSnFR\_ER with-cytosine and iCyt\_F\_SnFR\_ER with 10-fluorocytosine arise  
432 because these drugs cross membranes more slowly.

433 To examine localization of the \_PM and \_ER constructs at higher optical resolution, we  
434 imaged HeLa cells and primary mouse hippocampal culture using a spinning disk laser scanning  
435 inverted confocal microscope. As previously observed, ER-targeted iDrugSnFR was retained in  
436 the ER (Fig. 7-figure supplement 1, Fig. 8-figure supplement 1) (Shivange, et al., 2019).  
437 iDrugSnFR targeted to the PM showed correct localization, with some iDrugSnFR observed in  
438 the cell interior (most likely as part of the cellular membrane trafficking system (Fig. 7-figure  
439 supplement 1; Fig. 8-figure supplement 1).

440 Several complexities in the HeLa cell and neuron experiments imposed uncertainties on our  
441 kinetic analyses. These complexities include the limitations of solution changes, diffusion within  
442 cytoplasm, unknown mixing at the surface facing the coverslip, and corrections for baseline drift  
443 due to bleaching. We restrict the quantitative comparisons to the estimate that cytosine and 10-  
444 fluorocytosine cross the membrane > 30 fold more slowly than the other drugs tested.

445

446

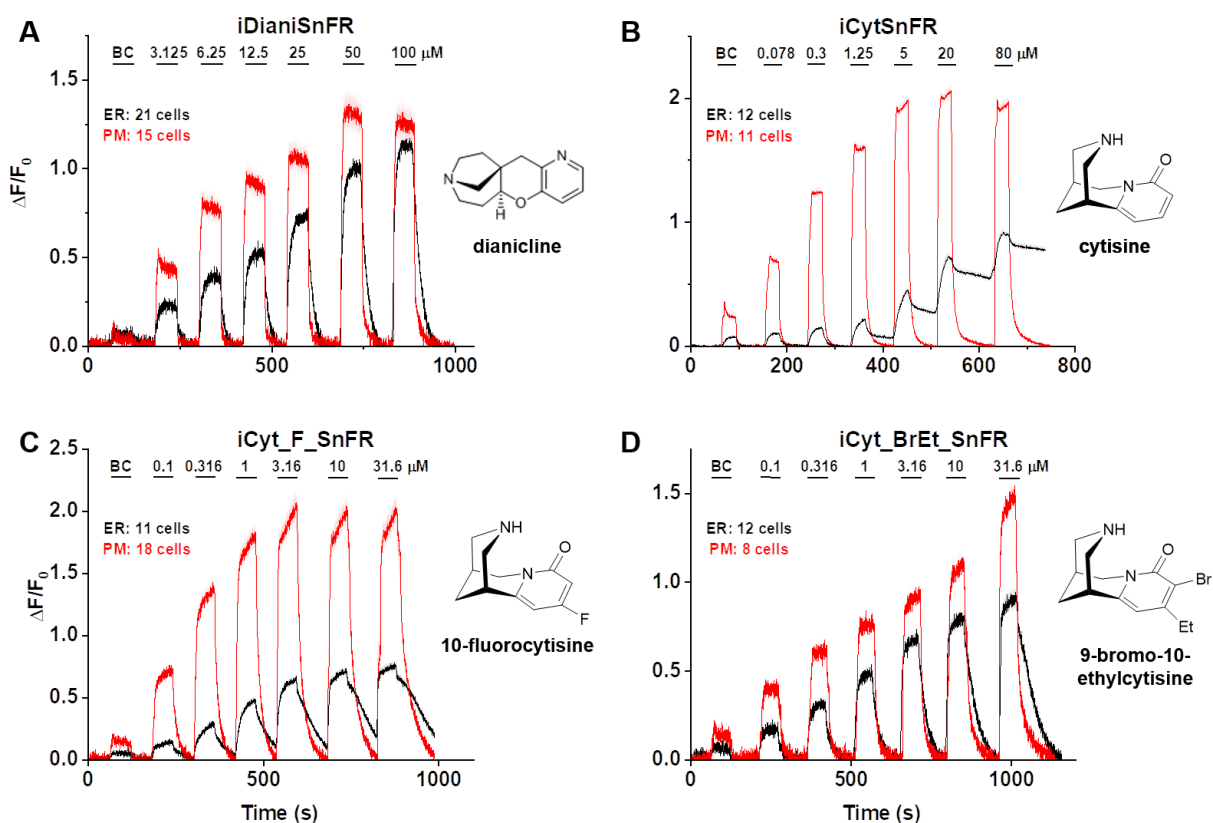

447  
448 **Figure 7.** Nicotinic agonist iDrugSnFR dose-response relations in HeLa cells. **(A-D)** Each  
449 iDrugSnFR detects its drug partner at the PM and ER of HeLa cells at the concentrations sampled.  
450 BC = Buffer control. SEM of data are indicated by semi-transparent shrouds around traces where  
451 trace width is exceeded. **(A)** iDianiSnFR detects dianicline with a return to baseline fluorescence  
452 between drug applications. **(B)** iCytSnFR detection at the PM returns to baseline fluorescence  
453 between applications, while detection at the ER shows incomplete wash-in and washout. **(C)**  
454 iCyt\_F\_SnFR fluorescence response to the presence of 10-fluorocytisine in the ER also shows  
455 an incomplete washout between applications. **(D)** iCyt\_BrEt\_SnFR detects 9-bromo-10-  
456 ethylcytisine with wash-in and washout fluorescence similar to the pattern seen in iDianiSnFR.  
457

458

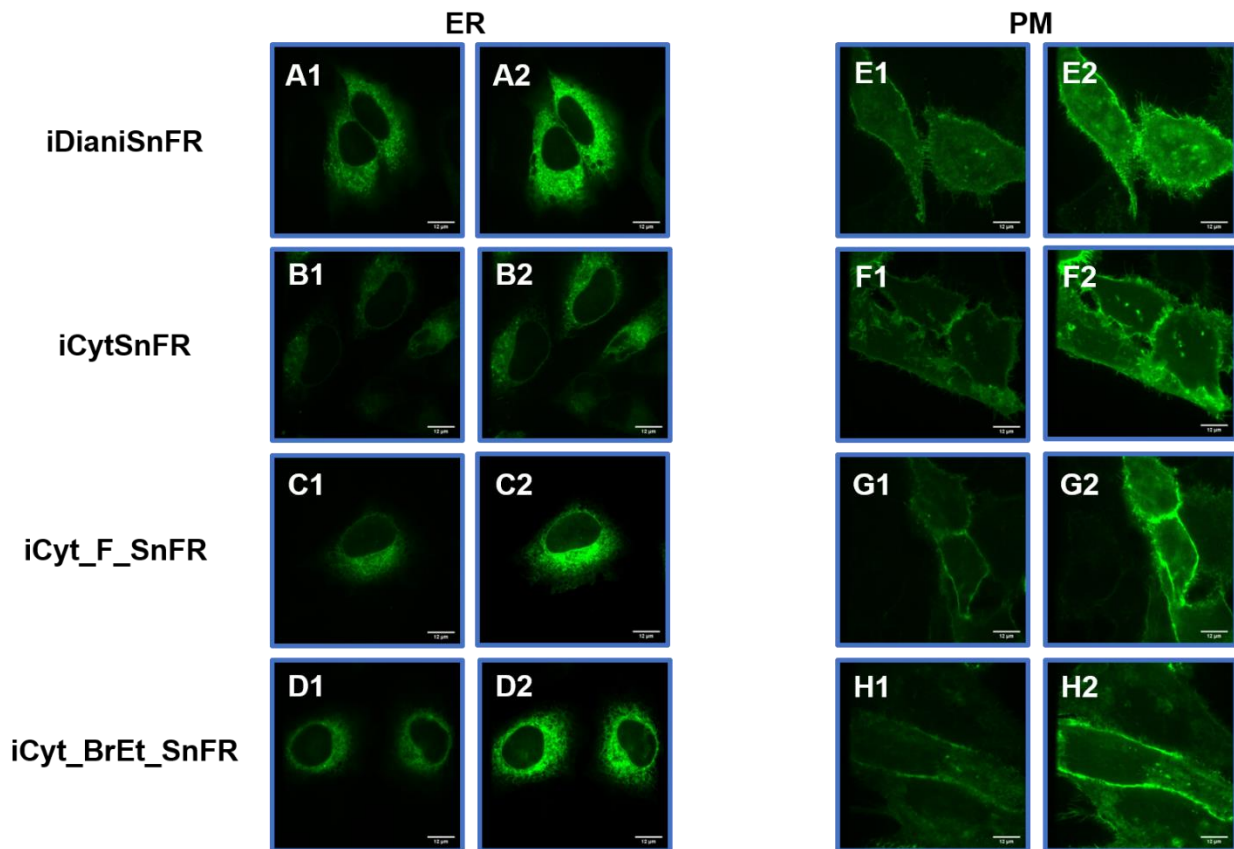

459

460 **Figure 7-figure supplement 1.** Spinning disk laser scanning confocal inverted microscope

461 images of nicotinic agonist iDrugSnFRs in HeLa cells. ER-targeted constructs of iDianiSnFR,

462 iCytSnFR, iCyt\_F\_SnFR, iCyt\_BrEt\_SnFR are shown before **(A1-D1)** and during **(A2-D2)**

463 exposure to each drug partner. ER-targeted iDrugSnFRs show the reticulated ER and dark ovals

464 corresponding to the nucleus. PM-targeted constructs of the same iDrugSnFRs are shown before

465 **(E1-H1)** and after **(E2-H2)** drug introduction. Localization to the PM is robust, with some minimal

466 puncta that may represent inclusion bodies or internal transport.

467

468

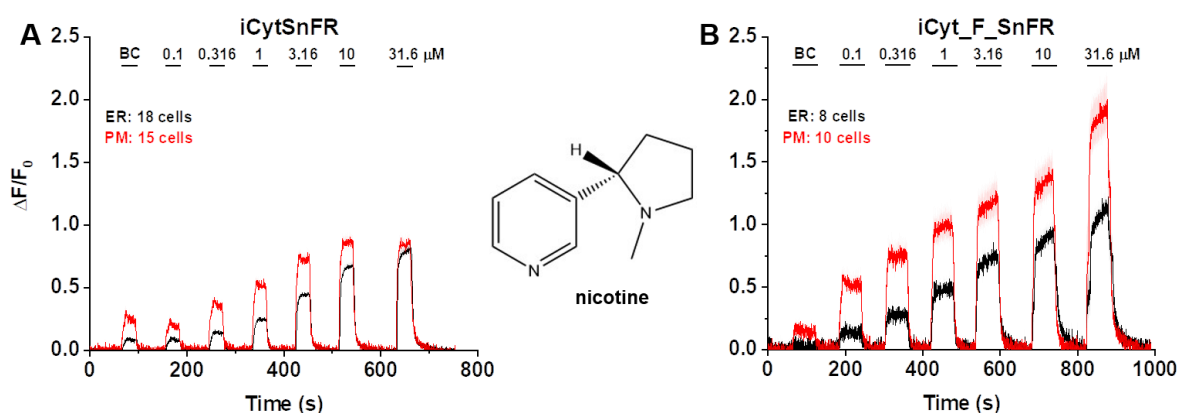

469

470 **Figure 7-figure supplement 2.** Dose-response relations for iCytSnFR and iCyt\_F\_SnFR against

471 nicotine in HeLa cells. BC = Buffer control. SEM of data are indicated by semi-transparent shrouds

472 around traces where trace width is exceeded. **(A)** iCytSnFR and **(B)** iCyt\_F\_SnFR detect nicotine

473 at both the PM and ER. Nicotine enters and exits the ER rapidly over seconds, a direct contrast

474 to the behavior of cytosine and 10-fluorocytosine as detected by their iDrugSnFR partners.

475



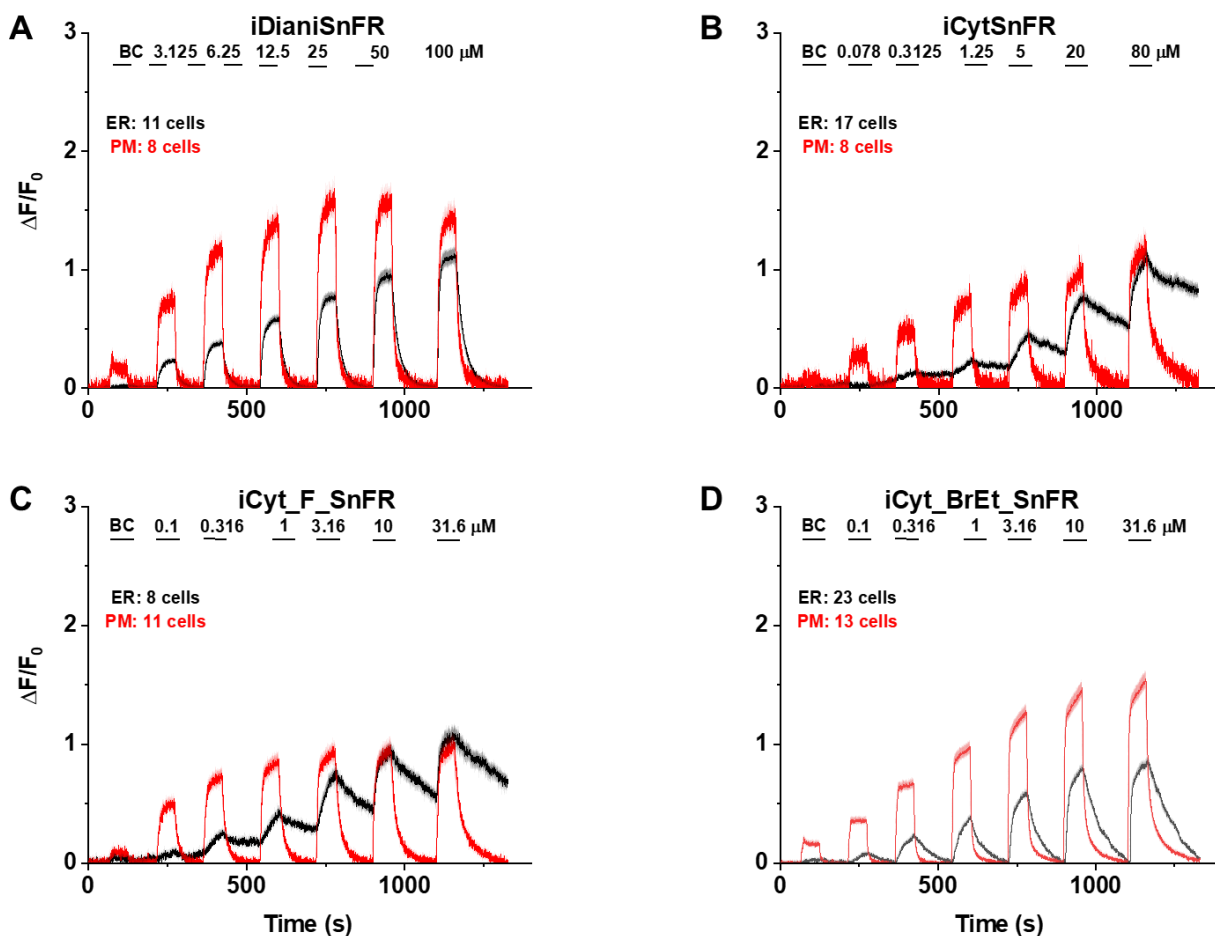

476

477

478 **Figure 8.** Nicotinic agonist iDrugSnFR dose-response experiments in mouse primary  
479 hippocampal neurons transduced with AAV9-hSyn iDrugSnFR. Cultured primary mouse  
480 hippocampal neurons were transduced with ER- or PM- targeted constructs. BC = Buffer control.  
481 SEM of data are indicated by semi-transparent shrouds around traces where trace width is  
482 exceeded. **(A-D)** Each iDrugSnFR detects its drug partner at the PM and ER over the  
483 concentrations sampled. **(A)** iDianiSnFR detects dianicline with a return to baseline fluorescence  
484 between drug applications. **(B)** iCytSnFR detection at the PM returns to baseline fluorescence  
485 between applications, while detection at the ER shows an incomplete washout. **(C)** iCyt\_F\_SnFR  
486 fluorescence response to the presence of 10-fluorocytisine in the ER also shows an incomplete

487 washout between applications. **(D)** iCyt\_BrEt\_SnFR\_ER detects 9-bromo-10-ethylcytisine with a  
488 wash-in and decay intermediate between iDianiSnFR and the other two cytisine derivatives.  
489

490  
491

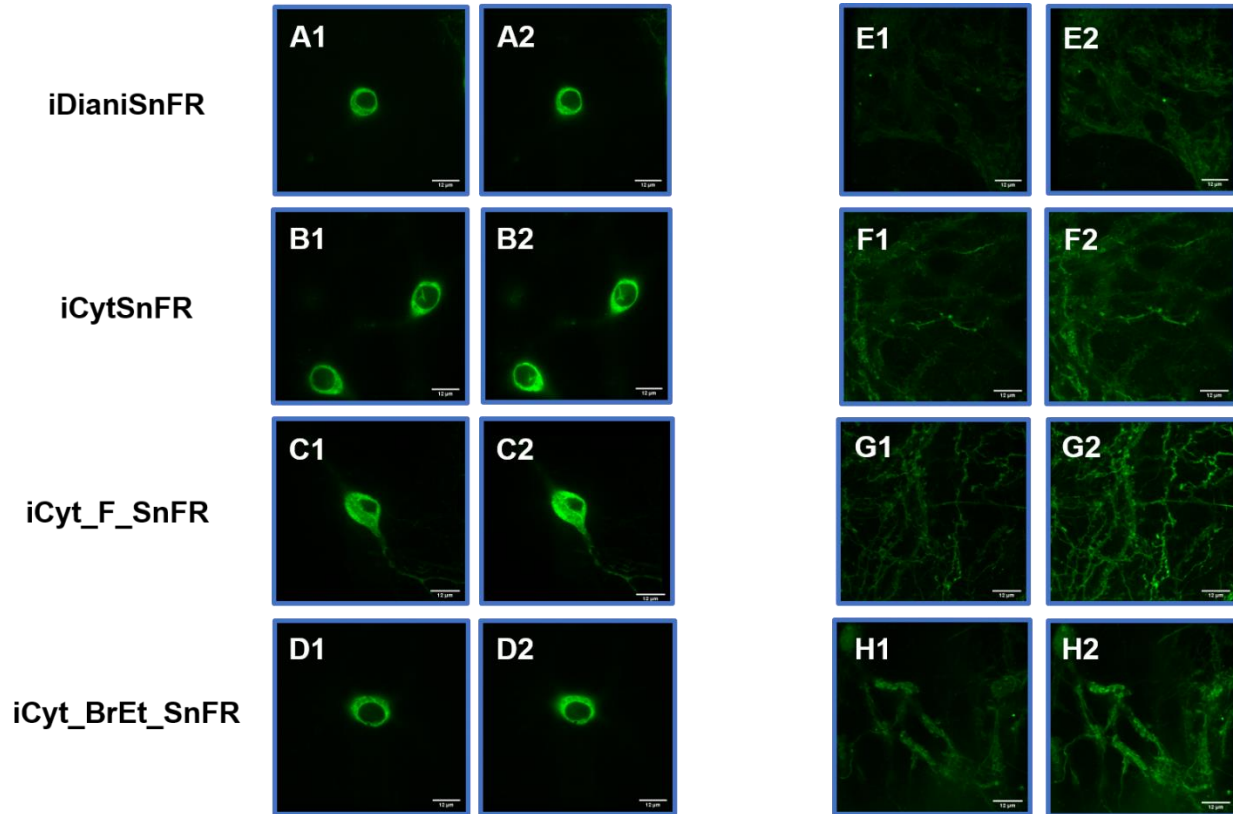

492  
493 **Figure 8-figure supplement 1.** Spinning disk laser scanning confocal inverted microscope  
494 images of nicotinic agonist iDrugSnFRs in primary mouse hippocampal neurons. ER-targeted  
495 constructs of iDianiSnFR, iCytSnFR, iCyt\_F\_SnFR, and iCyt\_BrEt\_SnFR are shown before (**A1-**  
496 **D1**) and during (**A2-D2**) exposure to each drug partner. ER-targeted iDrugSnFRs show the  
497 reticulated the ER and dark ovals corresponding to the nucleus. PM-targeted constructs of the  
498 same iDrugSnFRs are shown before (**E1-H1**) and after (**E2-H2**) drug introduction. Localization in  
499 the PM is robust, with some minimal puncta that may represent inclusion bodies or internal  
500 transport.

501

## 502 Discussion

503

### 504 ***Membrane permeation of molecules with low $\log D_{pH7.4}$***

505 The experiments show, to our knowledge, the first time-resolved measurements of  
506 membrane permeation for drugs in the  $\log D_{pH7.4}$  range less than -1. Most orally available drugs  
507 have  $\log D_{pH7.4}$  values between 2 and 4 (Smith, Allerton, Kalgutkar, van de Waterbeemd, & Walker,  
508 2012). Cytisine, varenicline, dianicline, and the cytisine analogs studied here have calculated  
509 membrane partition coefficients some 3 to 6 orders of magnitude lower. These values and their  
510 order vary according to the algorithm, partially because of uncertainties in predicting  $pK_a$  (Pienko,  
511 et al., 2016); here we provide values calculated by Chemicalize (see Methods): 10-fluorocytisine,  
512 -2.70; cytisine, -2.64; 9-bromo-10-ethylcytisine, -1.13; varenicline, -1.27, dianicline, -1.29; It is  
513 remarkable that drugs with such low calculated partition coefficients do cross membranes on a  
514 time scale of seconds (9-bromo-10-ethylcytisine, varenicline, dianicline) to minutes (10-  
515 fluorocytisine, cytisine). According to some (but not all) algorithms, the calculated  $\log D_{pH7.4}$  values  
516 fall in the same two classes as the measured kinetics of membrane permeability: 10-fluorocytisine  
517 and cytisine are the slowest, and only these two agonists have  $\log D_{pH7.4}$  values  $< -2$ . These  
518 observations support previous work suggesting that differences among chemical properties of  
519 nicotinic partial agonists correlate with drug permeation into the cerebrospinal fluid (CSF) after  
520 peripheral administration in mice (Rollema, et al., 2010).

521

### 522 ***The iDrugSnFR paradigm***

523 The iDrugSnFRs are sensitive enough to allow experiments near the experimentally  
524 determined (or otherwise projected) concentration in the human blood and CSF (Astroug,

525 Simeonova, Kassabova, Danchev, & Svinarov, 2010; Jeong, Sheridan, Newcombe, & Tingle,  
526 2018; Rollema, et al., 2010). The iDrugSnFRs have the advantage that they measure free  
527 aqueous ligand concentration (“activity”), as sensed by nAChRs. Targeting sequences provide  
528 for visualization within the lumen of organelles—here, the ER.

529 The experiments do not use radiolabeled drugs, *in vivo* microdialysis or other experiments  
530 on live animals, or mass spectrometry-liquid chromatography instruments. Once protein design  
531 has given an entry into a class of iDrugSnFRs, straightforward optimization at the binding site  
532 produces the desired, selective iDrugSnFRs for individual molecules. The experiments use  
533 standard, modest-power fluorescence microscopes. Cultured cell lines yield data comparable to  
534 cultured neurons.

### 535 ***Structure-function relations for nicotinic and other iDrugSnFRs***

536 This study shows that the amine group of nicotinic ligands makes equidistant cation- $\pi$   
537 interactions with two tyrosine residues (Tyr65, Tyr357), and this is confirmed by higher-resolution  
538 (1.5 to 1.7 Å) structures of varenicline, acetylcholine, and choline crystallized with isolated PBP  
539 moieties (PDB 7S7X, S6V1R, 7S7Z, respectively; see also 3R6U, 6EYQ, and 3PPQ). Cation- $\pi$   
540 interactions also occur for cholinergic and/or nicotinic ligands in nAChRs (Morales-Perez,  
541 Noviello, & Hibbs, 2016; Post, Tender, Lester, & Dougherty, 2017), the acetylcholine-binding  
542 protein (Celie, et al., 2004), PBPs (Schiefner, et al., 2004), and muscarinic receptors (Haga, et  
543 al., 2012). We also observe that the protonated amine of varenicline makes a hydrogen bond to  
544 a backbone carbonyl group, another similar theme in acetylcholine binding protein (Celie, et al.,  
545 2004) and nAChRs (Xiu, Puskar, Shanata, Lester, & Dougherty, 2009).

546 This study presents a general step forward in understanding the structure-function relations  
547 of iDrugSnFRs. The chromophore in the cpGFP moiety of most present iDrugSnFRs (this paper,  
548 iGluSnFR, iSeroSnFR) contains a tyrosine in an extended  $\pi$  system (Ormo, et al., 1996; Tsien,  
549 1998). The photophysics of the chromophore depends strongly on the surrounding water

550 molecules and side chains (Brejc, et al., 1997; Tsien, 1998). We found that Glu78 in Linker 1  
551 changes its orientation: in the liganded state, it interacts with two positively charged residues  
552 (Lys97 and Arg99) on the surface of the cpGFP; and in the apo state, Glu78 has moved ~ 14 Å  
553 to form a hydrogen bonding interaction with the tyrosine moiety of the chromophore. Presumably  
554 the liganded state of iNicSnFR3adt allows for a water molecule to hydrogen bond with the hydroxy  
555 group of the chromophore, promoting its fluorescence; but this water molecule is replaced by  
556 protonated Glu78 in the unliganded state, which leads to nonfluorescent state of cpGFP, as  
557 suggested by (Nasu, et al., 2021).

558 While we cannot resolve the protonation-deprotonation event, the available functional data  
559 show good support for its occurrence, as follows. (a) The apo form of the iDrugSnFR increases  
560 its  $F_0$  by ten-fold per pH unit (Shivange, et al., 2019), as though when deprotonated, Glu78 leaves  
561 the “candle snuffer” position and moves to make the salt bridges with Lys97 and Arg99. (b) The  
562  $EC_{50}$  for the ligand decreases by ten-fold per pH unit (Shivange, et al., 2019), as though the  
563 conformation of the linker that forms the salt-bridge form is also the closed, liganded, fluorescent  
564 form of the PBP. Other observations favor the crucial role of the Glu78-chromophore interaction.  
565 (a) Only glutamate functions in position 78 of iSeroSnFR (Unger, et al., 2020). (b) The mTurquoise  
566 variant in iGluSnFR, which has a tryptophan chromophore, requires entirely different linkers  
567 (Marvin, et al., 2018).

## 568 ***Challenges at the intersection of pharmaceutical science and nicotine addiction science***

569 Our measurements show that nicotinic ligands with  $\log D_{pH7.4} < \sim -2$  cross membranes much  
570 more slowly than do ligands with  $\log D_{pH7.4} > \sim -2$ . These measurements have two, possibly  
571 opposing, implications for future smoking cessation drugs. On the one hand,  $\alpha 4\beta 2$  agonists that  
572 enter the ER, like nicotine and varenicline, upregulate nAChRs (Turner, Castellano, & Blendy,  
573 2011), which may be necessary and sufficient for addiction (Henderson & Lester, 2015); and  
574 maintenance of upregulation by varenicline may help to explain its suboptimal quit rate. On the

575 other hand, ligands that do not enter the ER are also unlikely to enter the brain and therefore  
576 unlikely to be useful for smoking cessation.

577 Smoking cessation drugs must also contend with other ER-based processes. (1) Most drug  
578 metabolism takes place in the ER; (2) Upregulation occurs at sustained agonist concentration in  
579 the ER some hundredfold lower than the extracellular concentrations that transiently activate  
580  $\alpha 4\beta 2$  nAChRs (Kuryatov, Luo, Cooper, & Lindstrom, 2005).

581 Given these challenges, further progress may be possible now that we have two types of  
582 real-time, living cellular preparations. (1) For decades, cellular preparations have been available  
583 to measure nAChR pharmacodynamics and upregulation. (2) Now, the iDrugSnFRs present a  
584 paradigm to measure cellular and subcellular pharmacokinetics.

585

## 586 Methods

### 587 **Crystallography**

588 The gene encoding the full-length biosensor iNicSnFR3a was previously cloned into a  
589 bacterial expression vector (Shivange, et al., 2019). To improve crystallization, we deleted the N-  
590 terminal tags His<sub>6</sub> and HA tags and the N-terminal Myc tag, forming the constructs with the suffix  
591 “dt”. These deletions were carried out with the Q5 Site-Directed Mutagenesis Kit (New England  
592 Biolabs, Ipswich, MA). All proteins were overexpressed in *E. coli* BL21-gold (DE3) cells (Agilent  
593 Technologies, Santa Clara, CA) using ZYM-5052 autoinduction media (Studier, 2005). Cells were  
594 collected by centrifugation and stored at -80 °C until use.

595 For purification, frozen cell pellets were resuspended in lysis buffer containing 100 mM NaCl,  
596 20 mM Tris, pH 7.5, 20 mM imidazole, pH 7.5, 5 mM β-mercaptoethanol (BME), lysozyme, DNase,  
597 and protease inhibitor tablet. The resuspended cells were lysed by freezing and thawing using  
598 liquid nitrogen and a room temperature water bath for 3 cycles. Intact cells and cell debris were  
599 removed by centrifugation at ~20,000x g for 40 min at 4 °C. The supernatant was collected and  
600 loaded onto a prewashed Ni NTA column with wash buffer at 4 °C. Ni NTA wash buffer contained  
601 100 mM NaCl, 20 mM Tris, pH 7.5, 30 mM imidazole, pH 7.5, and 5 mM BME. Elution was  
602 achieved using the same buffer with 300 mM imidazole, pH 7.5. The eluted sample was further  
603 purified by size exclusion chromatography using HiLoad 16/60 Superdex 200 in the same buffer  
604 without imidazole and BME. Peak fractions were collected and concentrated to ~50 mg/ml with  
605 Amicon Ultra 15 filter unit (Millipore, Burlington, MA) with 10kDa cutoff.

606 For all constructs, initial crystallization screening was carried out with 40 mg/ml protein in the  
607 presence and absence of 10 mM nicotine or varenicline. iNicSnFR3adt crystallized separately  
608 with 10 mM nicotine and varenicline in PACT premier (Molecular Dimensions, Sheffield, England),  
609 condition #96 with 0.2 M sodium malonate dibasic monohydrate, 0.1 M Bis-Tris Propane, pH 8.5,



610 and 20% polyethylene glycol (PEG) 3,350 at 20 °C. Crystals of iNicSnFR3adt grew within two  
611 weeks of crystallization in a hexagonal rod shape with dimensions of ~ 80 μm x 80 μm x 300 μm.  
612 Crystals were harvested and cryo-protected in 25% ethylene glycol, 0.2 M sodium malonate  
613 dibasic monohydrate, 0.1 M BisTrisPropane pH 8.5, and 20% PEG 3350. Phase information was  
614 obtained through soaking with KI before cryo-protection. The unliganded iNicSnFR3adt  
615 crystallized in Morpheus (Molecular Dimensions), condition #92 with 2.5% PEG 1,000, 12.5%  
616 PEG 3,350, 12.5% 2-methyl-2,4-pentanediol, 0.02 M of each amino acid, and 0.1 M  
617 MOPS/HEPES-Na, pH 7.5 at 23 °C with no further optimization.

618 X-ray datasets were collected at Stanford Synchrotron Radiation Laboratory beamline 12-2  
619 and Advanced Light Source beamline 5.0.2 using Pilatus 6M detectors. All datasets were  
620 processed and integrated with XDS (Kabsch, 2010) and scaled with Aimless (Winn, et al., 2011).  
621 For iNicSnFR3adt, molecular replacement was carried out using domains of the unliganded  
622 structure (PDB ID: 6EFR) with Phaser in Phenix (Adams, et al., 2010). The experimental phase  
623 information of KI-soaked crystals of iNicSnFR3adt was obtained with MR-SAD using AutoSol in  
624 Phenix (Adams, et al., 2010). Molecular replacements of the remaining structures were carried  
625 out with the refined model of iNicSnFR3adt. Iterative refinement and model building cycles for all  
626 structures were carried out separately with phenix.refine in Phenix (Adams, et al., 2010) and Coot  
627 (Emsley, Lohkamp, Scott, & Cowtan, 2010).

## 628 ***Directed evolution of iDrugSnFR proteins using bacterial-expressed protein assays***

629 Starting with iAChSnFR and intermediate biosensor constructs of that sensor, we constructed  
630 and optimized iDrugSnFRs for each drug partner during iterative rounds of SSM as previously  
631 described (Bera, et al., 2019; Shivange, et al., 2019). We utilized the 22-codon procedure  
632 including a mixture of three primers, creating 22 unique codons encoding the 20 canonical amino  
633 acids (Kille, et al., 2013). The 22-codon procedure yields an estimated > 96% residue coverage  
634 for a collection of 96 randomly chosen clones.

635 A Tecan Spark M10 96-well fluorescence plate reader (Tecan, Männedorf, Switzerland) was  
636 used to measure baseline and drug-induced fluorescence ( $F_0$  and  $\Delta F$ , respectively). Bacterial  
637 lysates were tested with excitation at 485 nm and emission at 535 nm. Lysates were also  
638 measured against choline to evaluate potential endogenous intracellular binding. Promising  
639 clones were amplified and sequenced. The optimally responding construct in each round of SSM  
640 was used as a template for the next round of SSM.

641 S-slope allows for comparison between iDrugSnFRs with differing  $\Delta F_{max}/F_0$  values (Bera, et  
642 al., 2019) at the beginning of the dose-response relation, which is usually the pharmacologically  
643 relevant range. With lysates or purified protein, which allow complete dose-response relations,  
644 the Hill coefficient is near 1.0. We therefore calculated

$$645 \quad S_{slope} = \frac{\Delta F_{max}}{F_0} / EC_{50},$$

646 in units of  $\mu\text{M}^{-1}$ .

647

#### 648 **Measurements on purified iDrugSnFRs**

649 Biosensors selected for further study were purified using a His<sub>6</sub> sequence using an ÄKTA  
650 Start FPLC (GE Healthcare, Chicago, IL) as previously described (Shivange, et al., 2019).  
651 Performance of protein quantification and dose-response relations for drug-sensor partners was  
652 also as previously described (Shivange, et al., 2019). Where appropriate, we corrected for  
653 depletion of the ligand by binding with the equation,

$$654 \quad \frac{\Delta F}{\Delta F_{max}} = \frac{K_D + [S] + [L] - \sqrt{([S]^2 + [L]^2 + K_D^2) - 2[S][L] + 2[S]K_D + 2[L]K_D}}{2[S]},$$

655 where  $K_D$  is the ligand-sensor equilibrium dissociation constant (we assume that  $K_D = EC_{50}$ ),  $[S]$   
656 is the iDrugSnFR protein concentration (typically 100 nM), and  $[L]$  is the nominal ligand  
657 concentration.

## 658 ***Isothermal titration calorimetry***

659 Experiments were performed on an Affinity ITC (TA instruments, New Castle, DE) at  
660 25 °C. The iDrugSnFR protein was buffer-exchanged into 3x PBS, pH 7.0. The nicotinic agonists  
661 were dissolved in the same buffer. 800  $\mu$ M cytosine (Sigma Aldrich, Munich, Germany) was titrated  
662 into 80  $\mu$ M iCytSnFR, 160  $\mu$ M 10-fluorocytosine was titrated into 16  $\mu$ M iCyt\_F\_SnFR. 470  $\mu$ M 9-  
663 bromo-10-ethylcytosine was titrated into 47  $\mu$ M iCyt\_BrEt\_SnFR. 1.5 mM dianicline (Tocris, Bio-  
664 Techne, Minneapolis, MN) was titrated into 150  $\mu$ M iDianiSnFR. Analysis, including correction for  
665 changes in enthalpy generated from the dilution of the ligands, was performed using a single-site  
666 binding model in the manufacturer's Nanoanalyze software.

## 667 ***Stopped-flow kinetic analysis***

668 Kinetics were determined by mixing equal volumes of 0.2  $\mu$ M iDrugSnFR protein (in 3x  
669 PBS, pH 7.0) with varying concentrations of cognate ligand in an Applied Photophysics (Surrey,  
670 United Kingdom) SX20 stopped-flow fluorimeter with 490 nm LED excitation and 510 nm long-  
671 pass filter at room temperature (22 °C). "Mixing shots" were repeated five times and averaged  
672 (except for 100 s experiments, which were collected only once). Standard deviations are not  
673 included on the plots, but are nearly the same size as the data markers. The first 3 ms of data  
674 were ignored because of mixing artifacts and account for the dead time of the instrument.

675 Data were plotted and time courses were fitted, when possible, to a single exponential,  
676 and  $k_{\text{obs}}$  was plotted as a function of [ligand]. The linear portion of that graph was fit, with the slope  
677 reporting  $k_1$  and the y-intercept reporting  $k_{-1}$ . When the time course did not fit well to a single rising  
678 exponential, it was fitted to the sum of two increasing exponentials, and the first rise ( $k_{\text{obs}1}$ ) was  
679 treated as above to determine  $k_1$  and  $k_{-1}$ .

## 680 ***Expression in mammalian cells***

681 We constructed two variants of each iDrugSnFR for expression in mammalian cells. The  
682 plasma membrane (suffix \_PM) and endoplasmic reticulum (suffix \_ER) variants were constructed  
683 by circular polymerase extension cloning (Quan & Tian, 2009). To create the \_PM constructs, we  
684 cloned the bacterial constructs into pCMV(MinDis), a variant of pDisplay (ThermoFisher Scientific,  
685 Waltham, MA) lacking the hemagglutinin tag (Marvin, et al., 2013). To generate the \_ER  
686 constructs, we replaced the 14 C-terminal amino acids (QVDEQKLISEEDLN, including the Myc  
687 tag) with an ER retention motif, QTAEKDEL (Shivange, et al., 2019).

688 We transfected the iDrugSnFR cDNA constructs into HeLa and HEK293T cells. Cell lines  
689 were purchased from ATCC (Manassas, VA) and cultured according to ATCC protocols. For  
690 chemical transfection, we utilized either Lipofectamine 2000 or Lipofectamine 3000  
691 (ThermoFisher Scientific), following the manufacturer's recommended protocol. Cells were  
692 incubated in the transfection medium for 24 h and imaged 24 – 48 h after transfection.

### 693 ***Millisecond timescale microperfusion***

694 HEK293T cells were imaged using a Nikon (Tokyo, Japan) DIAPHOT 300 with a Zeiss 63X  
695 objective (1.5 NA). Because the ligand concentration after micro-iontophoretic drug application  
696 (Shivange, et al., 2019) is unknown, we applied drugs with a laminar-flow microperfusion (Model  
697 SS-77B Fast-Step perfusion system (Warner Instruments, Holliston, MA). In an array of three  
698 square glass capillaries (600  $\mu$  i.d.), the center capillary contained vehicle (Hanks buffered salt  
699 solution, HBSS) plus drug, while the two outer capillaries contained vehicle only. Vehicle also  
700 flowed from a separate input connected to the bath perfusion system. Solution exchange,  
701 measured by loading the center capillary with dye, had a time constant of  $90 \pm 20$  ms (n = six  
702 trials).

703 We used Fiji ImageJ and Origin Pro 2018 (OriginLab, Northampton, MA) to fit the rise and  
704 decay of the iCytSnFR\_PM drug response to the sum of one or two exponential components. An

705 F-test determined whether two exponential components fit the data significantly better than one  
706 ( $p < 0.05$ ). Statistical comparisons between groups were carried out using ANOVA.

### 707 ***AAV production and transduction in primary mouse hippocampal neuronal culture***

708 The adeno-associated virus plasmid vector AAV9-hSyn was described previously (Challis, et  
709 al., 2019). Virus was purified using the AAVpro Purification Kit (TakaraBio USA). Mouse embryo  
710 dissection and culture were previously described (Shivange, et al., 2019). About 4 days after  
711 dissection, we transduced the \_ER construct at an MOI of .5 to  $5 \times 10^4$ ; and separately, the \_PM  
712 construct was transduced at an MOI of 0.5 to  $1 \times 10^5$ . Neurons were imaged ~2-3 weeks post-  
713 transduction.

### 714 ***Time-resolved fluorescence measurements in live mammalian cells and primary mouse*** 715 ***hippocampal neuronal culture***

716 Time-resolved dose-response imaging was performed on a modified Olympus IX-81  
717 microscope (Olympus microscopes, Tokyo, Japan), in widefield epifluorescence mode using a  
718 40X lens. Images were acquired at 2 – 4 frames/s with a back-illuminated EMCCD camera (iXon  
719 DU-897, Andor Technology USA, South Windsor, CT), controlled by Andor IQ3 software.  
720 Fluorescence measurements at  $\lambda_{\text{ex}} = 470$  nm and the epifluorescence cube were as previously  
721 described (Shivange, et al., 2019; Srinivasan, et al., 2011).

722 Solutions were delivered from elevated reservoirs by gravity flow, via solenoid valves  
723 (Automate Scientific, Berkeley, CA), then through tubing fed into a manifold, at a rate of 1-2  
724 ml/min. The vehicle was HBSS. Other details have been described (Shivange, et al., 2019;  
725 Srinivasan, et al., 2011). Data analysis procedures included subtraction of “blank” (extracellular)  
726 areas and corrections for baseline drifts using Origin Pro 2018.

### 727 ***Spinning disk confocal fluorescence images***

728 HeLa cells and mouse primary hippocampal culture were transfected or transduced as  
729 described above. Live-cell images were collected using a Nikon Ti-E spinning disk laser scanning  
730 confocal inverted microscope equipped with 100X objective, 1.49 NA (oil), 120 µm WD. The laser  
731 wavelength was 488 nm at 15% power. Dishes were imaged in a custom incubator (Okolab,  
732 Ottaviano, Italy) at 37° C and 5% CO<sub>2</sub>. Initial images were taken in HBSS. To add drug, we  
733 doubled the bath volume by adding HBSS containing drug, using a hand-held pipette. The final  
734 drug concentrations: dianicline, 15 µM; cytosine, 10 µM; 10-fluorocytosine, 10 µM; 9-bromo-10-  
735 ethylcytosine, 7.5 µM.

### 736 ***LogD calculations***

737 We used Chemicalize ( <https://chemaxon.com/products/chemicalize> ). The software uses  
738 algorithms to calculate LogP and pK<sub>a</sub>. The software then calculates  
739  $\text{LogD}_{7.4} = \text{logP} - \text{log}[1 + 10^{7.4 - \text{pKa}}]$ .

### 740 ***Plasmid availability***

741 We will deposit plasmids with the following cDNAs at Addgene:

742 iDianiSnFR,

743 iCytSnFR,

744 iCyt\_F\_SnFR,

745 iCyt\_BrEt\_SnFR

746

747 We will deposit the following plasmids at Addgene:

748 pCMV(MinDis)-iDianiSnFR\_PM,

749 pCMV(MinDis)-iCytSnFR\_PM

750 pCMV(MinDis)-iCyt\_F\_SnFR\_PM

751 pCMV(MinDis)-iCyt\_BrEt\_SnFR\_PM

752 pCMV(MinDis)-iDianiSnFR\_ER,  
753 pCMV(MinDis)-iCytSnFR\_ER,  
754 pCMV(MinDis)-iCyt\_F\_SnFR\_ER,  
755 pCMV(MinDis)-iCyt\_BrEt\_SnFR\_ER  
756 pAAV9-hSyn-iDianiSnFR\_PM,  
757 pAAV9-hSyn-iCytSnFR\_PM,  
758 pAAV9-hSyn-iCyt\_F\_SnFR\_PM,  
759 pAAV9-hSyn iCyt\_BrEt\_SnFR\_PM,  
760 pAAV9-hSyn-iDianiSnFR\_ER,  
761 pAAV9-hSyn-iCytSnFR\_ER,  
762 pAAV9-hSyn-iCyt\_F\_SnFR\_ER,  
763 pAAV9-hSyn iCyt\_BrEt\_SnFR\_ER,  
764  
765  
766  
767  
768

## 769 **Acknowledgements**

770 We thank Stefan Petrovic for his stewardship of the isothermal titration calorimeter in the Caltech  
771 Center for Molecular Medicine, Jens Kaiser for help with structural studies at the Caltech  
772 Molecular Observatory, the Gradinaru lab and Caltech CLOVER Center for help with viral vectors,  
773 and Andres Collazo and Giada Spigolon at the Caltech Biological Imaging Facility. We thank Zoe  
774 Beatty, Kallol Bera, Eve Fine, Shan Huang, Elaine Lin, Stephen Mayo, Lin Tian, and Elizabeth  
775 Unger for advice and guidance. We thank Achieve Life Sciences for a gift of cytisine.

## 776 **Competing interests**

777 The authors declare no financial or non-financial competing interests.

## 778 **Funding**

779 California Tobacco-Related Disease Research Program (TRDRP) (27FT-0022), Aaron L.  
780 Nichols.

781 California Tobacco-Related Disease Research Program (TRDRP) (27IP-0057), Henry A. Lester.

782 California Tobacco-Related Disease Research Program (TRDRP) (T29IR0455), Dennis A.  
783 Dougherty.

784 NIH (GM-123582, DA043829), Henry A. Lester.

785 NIH (DA049140, GM7616), Anand K. Muthusamy.

786 Howard Hughes Medical Institute (Loren L. Looger, Jonathan S. Marvin, Douglas C. Rees).

787 UK Engineering and Physical Sciences Research Council (No. EP/N024117/1), Timothy

788 Gallagher.



789 Leiden University International Studies Fund (LISF L18020-1-45), Laura Luebbert.

790

791

792

## 793 References

- 794  
795 Adams, P. D., Afonine, P. V., Bunkoczi, G., Chen, V. B., Davis, I. W., Echols, N., et al. (2010).  
796 PHENIX: A comprehensive Python-based system for macromolecular structure solution.  
797 *Acta Crystallographica D Biological Crystallography*, 66(Pt 2), 213-221. doi:  
798 10.1107/S0907444909052925
- 799 Astroug, H., Simeonova, R., Kassabova, L. V., Danchev, N., & Svinarov, D. (2010).  
800 Pharmacokinetics of cytisine after single intravenous and oral administration in rabbits.  
801 *Interdiscip Toxicol*, 3(1), 15-20. doi: 10.2478/v10102-010-0003-5
- 802 Barnett, L. M., Hughes, T. E., & Drobizhev, M. (2017). Deciphering the molecular mechanism  
803 responsible for GCaMP6m's Ca<sup>2+</sup>-dependent change in fluorescence. *PLoS One*, 12(2),  
804 e0170934. doi: 10.1371/journal.pone.0170934
- 805 Bera, K., Kamajaya, A., Shivange, A. V., Muthusamy, A. K., Nichols, A. L., Borden, P. M., et al.  
806 (2019). Biosensors Show the Pharmacokinetics of S-Ketamine in the Endoplasmic  
807 Reticulum. *Front Cell Neurosci*, 13, 499. doi: 10.3389/fncel.2019.00499
- 808 Blom, A. E. M., Campello, H. R., Lester, H. A., Gallagher, T., & Dougherty, D. A. (2019). Probing  
809 Binding Interactions of Cytisine Derivatives to the  $\alpha 4\beta 2$  Nicotinic Acetylcholine Receptor.  
810 *J Am Chem Soc*. doi: 10.1021/jacs.9b06580
- 811 Borden, P., Shivange, A. V., Marvin, J. S., Cichon, J., Dan, C., Podgorski, K., et al. (2019). A  
812 genetically encoded fluorescent sensor for in vivo acetylcholine detection. *bioRxiv*.
- 813 Brejc, K., Sixma, T. K., Kitts, P. A., Kain, S. R., Tsien, R. Y., Ormo, M., et al. (1997). Structural  
814 basis for dual excitation and photoisomerization of the *Aequorea victoria* green fluorescent  
815 protein. *Proceedings of the National Academy of Sciences of the United States of*  
816 *America*, 94(6), 2306-2311.
- 817 Celie, P., van Rossum-Fikkert, S., Van Dyke, W., Brejc, K., Smit, A., & Sixma, T. (2004). Nicotine  
818 and Carbamylcholine Binding to Nicotinic Acetylcholine Receptors as Studied in AChBP  
819 Crystal Structures. *Neuron*, 41, 907-914.
- 820 Challis, R. C., Kumar, S. R., Chan, K. Y., Challis, C., Beadle, K., Jang, M. J., et al. (2019).  
821 Publisher Correction: Systemic AAV vectors for widespread and targeted gene delivery in  
822 rodents. *Nat Protoc*, 14(8), 2597. doi: 10.1038/s41596-019-0155-5
- 823 Chellappan, S. K., Xiao, Y., Tueckmantel, W., Kellar, K. J., & Kozikowski, A. P. (2006). Synthesis  
824 and pharmacological evaluation of novel 9- and 10-substituted cytisine derivatives.  
825 Nicotinic ligands of enhanced subtype selectivity. *J Med Chem*, 49(9), 2673-2676. doi:  
826 10.1021/jm051196m
- 827 Coe, J. W., Brooks, P. R., Vetelino, M. G., Wirtz, M. C., Arnold, E. P., Huang, J., et al. (2005).  
828 Varenicline: an alpha4beta2 nicotinic receptor partial agonist for smoking cessation. *J Med*  
829 *Chem*, 48(10), 3474-3477. doi: 10.1021/jm050069n
- 830 Cohen, C., Bergis, O. E., Galli, F., Lochead, A. W., Jegham, S., Biton, B., et al. (2003).  
831 SSR591813, a novel selective and partial alpha4beta2 nicotinic receptor agonist with  
832 potential as an aid to smoking cessation. *J Pharmacol Exp Ther*, 306(1), 407-420. doi:  
833 10.1124/jpet.103.049262
- 834 Elmore, D. E., & Dougherty, D. A. (2000). A computational study of nicotine conformations in the  
835 gas phase and in water. *Journal of Organic Chemistry*, 65(3), 742-747. doi:  
836 10.1021/jo991383q
- 837 Emsley, P., Lohkamp, B., Scott, W. G., & Cowtan, K. (2010). Features and development of Coot.  
838 *Acta Crystallographica D Biological Crystallography*, 66(Pt 4), 486-501. doi:  
839 10.1107/S0907444910007493
- 840 Fagerstrom, K., & Balfour, D. J. (2006). Neuropharmacology and potential efficacy of new  
841 treatments for tobacco dependence. *Expert Opin Investig Drugs*, 15(2), 107-116. doi:  
842 10.1517/13543784.15.2.107

- 843 Fan, C. (2020). *Structure, Function, and Application of Bacterial ABC Transporters*. Dissertation  
844 (Ph.D.), California Institute of Technology. Retrieved from  
845 <https://resolver.caltech.edu/CaltechTHESIS:06012020-160106726>
- 846 Govind, A. P., Vallejo, Y. F., Stolz, J. R., Yan, J. Z., Swanson, G. T., & Green, W. N. (2017).  
847 Selective and regulated trapping of nicotinic receptor weak base ligands and relevance to  
848 smoking cessation. *Elife*, 6. doi: 10.7554/eLife.25651
- 849 Haga, K., Kruse, A. C., Asada, H., Yurugi-Kobayashi, T., Shiroishi, M., Zhang, C., et al. (2012).  
850 Structure of the human M2 muscarinic acetylcholine receptor bound to an antagonist.  
851 *Nature*, 482(7386), 547-551. doi: 10.1038/nature10753
- 852 Henderson, B. J., & Lester, H. A. (2015). Inside-out neuropharmacology of nicotinic drugs.  
853 *Neuropharmacol*, 96(Pt B), 178-193. doi: 10.1016/j.neuropharm.2015.01.022
- 854 Houllier, N., Gouault, S., Lasne, M. C., & Rouden, J. (2006). Regio- and diastereoselective  
855 functionalization of (-)-cytisine. *Tetrahedron*, 62(50), 11679-11686. doi:  
856 10.1016/j.tet.2006.09.057
- 857 Imming, P., Klaperski, P., Stubbs, M. T., Seitz, G., & Gundisch, D. (2001). Syntheses and  
858 evaluation of halogenated cytisine derivatives and of bioisosteric thiocytisine as potent  
859 and selective nAChR ligands. *Eur J Med Chem*, 36(4), 375-388. doi: 10.1016/s0223-  
860 5234(01)01222-3
- 861 Jeong, S. H., Sheridan, J., Newcombe, D., & Tingle, M. (2018). Plasma concentrations of cytisine,  
862 a commercially available plant-based alkaloid, in healthy adult smokers taking  
863 recommended doses for smoking cessation. *Xenobiotica*, 48(12), 1245-1248. doi:  
864 10.1080/00498254.2017.1409916
- 865 Kabsch, W. (2010). Xds. *Acta Crystallographica D Biological Crystallography*, 66(Pt 2), 125-132.  
866 doi: 10.1107/S0907444909047337
- 867 Kille, S., Acevedo-Rocha, C. G., Parra, L. P., Zhang, Z. G., Opperman, D. J., Reetz, M. T., et al.  
868 (2013). Reducing codon redundancy and screening effort of combinatorial protein libraries  
869 created by saturation mutagenesis. *ACS Synth Biol*, 2(2), 83-92. doi: 10.1021/sb300037w
- 870 Kozikowski, A. P., Chellappan, S. K., Xiao, Y., Bajjuri, K. M., Yuan, H., Kellar, K. J., et al. (2007).  
871 Chemical medicine: novel 10-substituted cytisine derivatives with increased selectivity for  
872 alpha4beta2 nicotinic acetylcholine receptors. *ChemMedChem*, 2(8), 1157-1161. doi:  
873 10.1002/cmdc.200700073
- 874 Kuryatov, A., Luo, J., Cooper, J., & Lindstrom, J. (2005). Nicotine acts as a pharmacological  
875 chaperone to up-regulate human  $\alpha 4\beta 2$  acetylcholine receptors. *Mol Pharmacol*, 68(6),  
876 1839-1851.
- 877 Lancet, D., & Pecht, I. (1976). Kinetic evidence for hapten-induced conformational transition in  
878 immunoglobulin MOPC 460. *Proc Natl Acad Sci U S A*, 73(10), 3549-3553. doi:  
879 10.1073/pnas.73.10.3549
- 880 Le Houezec, J. (2003). Role of nicotine pharmacokinetics in nicotine addiction and nicotine  
881 replacement therapy: a review. *Int J Tuberc Lung Dis*, 7(9), 811-819.
- 882 Marcaurelle, L. A., Johannes, C., Yohannes, D., Tillotson, B. P., & Mann, D. (2009). Diversity-  
883 oriented synthesis of a cytisine-inspired pyridone library leading to the discovery of novel  
884 inhibitors of Bcl-2. *Bioorg Med Chem Lett*, 19(9), 2500-2503. doi:  
885 10.1016/j.bmcl.2009.03.037
- 886 Marvin, J. S., Borghuis, B. G., Tian, L., Cichon, J., Harnett, M. T., Akerboom, J., et al. (2013). An  
887 optimized fluorescent probe for visualizing glutamate neurotransmission. *Nat Methods*,  
888 10(2), 162-170. doi: 10.1038/nmeth.2333
- 889 Marvin, J. S., Scholl, B., Wilson, D. E., Podgorski, K., Kazemipour, A., Muller, J. A., et al. (2018).  
890 Stability, affinity, and chromatic variants of the glutamate sensor iGluSnFR. *Nat Methods*,  
891 15(11), 936-939. doi: 10.1038/s41592-018-0171-3

- 892 Mills, E. J., Wu, P., Spurdan, D., Ebbert, J. O., & Wilson, K. (2009). Efficacy of pharmacotherapies  
893 for short-term smoking abstinence: a systematic review and meta-analysis. *Harm Reduct*  
894 *J*, 6, 25. doi: 10.1186/1477-7517-6-25
- 895 Morales-Perez, C. L., Noviello, C. M., & Hibbs, R. E. (2016). X-ray structure of the human  
896 alpha4beta2 nicotinic receptor. *Nature*, 538(7625), 411-415. doi: 10.1038/nature19785
- 897 Nasu, Y., Shen, Y., Kramer, L., & Campbell, R. E. (2021). Structure- and mechanism-guided  
898 design of single fluorescent protein-based biosensors. *Nat Chem Biol*, 17(5), 509-518. doi:  
899 10.1038/s41589-020-00718-x
- 900 Ormo, M., Cubitt, A. B., Kallio, K., Gross, L. A., Tsien, R. Y., & Remington, S. J. (1996). Crystal  
901 structure of the *Aequorea victoria* green fluorescent protein. *Science*, 273(5280), 1392-  
902 1395.
- 903 Philipova, I., Stavrakov, G., Vassilev, N., Nikolova, R., Shivachev, B., & Dimitrov, V. (2015).  
904 Cytisine as a scaffold for ortho-diphenylphosphinobenzenecarboxamide ligands for Pd-  
905 catalyzed asymmetric allylic alkylation. *Journal of Organometallic Chemistry*, 778, 10-20.  
906 doi: 10.1016/j.jorganchem.2014.12.001
- 907 Pienko, T., Grudzien, M., Taciak, P. P., & Mazurek, A. P. (2016). Cytisine basicity, solvation, logP,  
908 and logD theoretical determination as tool for bioavailability prediction. *J Mol Graph Model*,  
909 63, 15-21. doi: 10.1016/j.jmgm.2015.11.003
- 910 Post, M. R., Tender, G. S., Lester, H. A., & Dougherty, D. A. (2017). Secondary Ammonium  
911 Agonists Make Dual Cation- $\pi$  Interactions in  $\alpha 4\beta 2$  Nicotinic Receptors. *eNeuro*, 4(2). doi:  
912 10.1523/eneuro.0032-17.2017
- 913 Quan, J., & Tian, J. (2009). Circular polymerase extension cloning of complex gene libraries and  
914 pathways. *PLoS One*, 4(7), e6441. doi: 10.1371/journal.pone.0006441
- 915 Rego Campello, H., Del Villar, S. G., Honraedt, A., Minguetz, T., Oliveira, A. S. F., Ranaghan, K.  
916 E., et al. (2018). Unlocking Nicotinic Selectivity via Direct C-H Functionalization of (-)-  
917 Cytisine. *Chem*, 4(7), 1710-1725. doi: 10.1016/j.chempr.2018.05.007
- 918 Rollema, H., & Hurst, R. S. (2018). The contribution of agonist and antagonist activities of  $\alpha 4\beta 2^*$   
919 nAChR ligands to smoking cessation efficacy: a quantitative analysis of literature data.  
920 *Psychopharmacology (Berl)*, 235(9), 2479-2505. doi: 10.1007/s00213-018-4921-9
- 921 Rollema, H., Shrikhande, A., Ward, K. M., Tingley, F. D., 3rd, Coe, J. W., O'Neill, B. T., et al.  
922 (2010). Pre-clinical properties of the alpha4beta2 nicotinic acetylcholine receptor partial  
923 agonists varenicline, cytisine and dianicline translate to clinical efficacy for nicotine  
924 dependence. *Br J Pharmacol*, 160(2), 334-345. doi: 10.1111/j.1476-5381.2010.00682.x
- 925 Rose, J. E., Behm, F. M., Westman, E. C., Levin, E. D., Stein, R. M., & Ripka, G. V. (1994).  
926 Mecamylamine combined with nicotine skin patch facilitates smoking cessation beyond  
927 nicotine patch treatment alone. *Clin Pharmacol Ther*, 56(1).
- 928 Rouden, J., Ragot, A., Gouault, S., Cahard, D., Plaquevent, J. C., & Lasne, M. C. (2002). Regio-  
929 and diastereoselective functionalization of (-)-cytisine: an unusual N-C acyl migration.  
930 *Tetrahedron-Asymmetry*, 13(12), 1299-1305. doi: Pii S0957-4166(02)00271-9  
931 Doi 10.1016/S0957-4166(02)00271-9
- 932 Schiefner, A., Breed, J., Bosser, L., Kneip, S., Gade, J., Holtmann, G., et al. (2004). Cation- $\pi$   
933 interactions as determinants for binding of the compatible solutes glycine betaine and  
934 proline betaine by the periplasmic ligand-binding protein ProX from *Escherichia coli*.  
935 [Research Support, Non-U.S. Gov't]. *J Biol Chem*, 279(7), 5588-5596. doi:  
936 10.1074/jbc.M309771200
- 937 Shivange, A. V., Borden, P. M., Muthusamy, A. K., Nichols, A. L., Bera, K., Bao, H., et al. (2019).  
938 Determining the pharmacokinetics of nicotinic drugs in the endoplasmic reticulum using  
939 biosensors. *J Gen Physiol*, 151(6), 738-757. doi: 10.1085/jgp.201812201
- 940 Smith, D., Allerton, C., Kalgutkar, A., van de Waterbeemd, H., & Walker, D. (2012).  
941 *Pharmacokinetics and Metabolism in Drug Design* (3rd ed.). Weinheim: Wiley.

- 942 Srinivasan, R., Pantoja, R., Moss, F. J., Mackey, E. D. W., Son, C., Miwa, J., et al. (2011). Nicotine  
943 upregulates  $\alpha 4\beta 2$  nicotinic receptors and ER exit sites via stoichiometry-dependent  
944 chaperoning. *J. Gen. Physiol.*, 137, 59-79. doi: 10.1085/jgp.201010532
- 945 Studier, F. W. (2005). Protein production by auto-induction in high-density shaking cultures.  
946 *Protein Expression and Purification*, 41(1), 207-234. doi: 10.1016/j.pep.2005.01.016
- 947 Tashkin, D. P. (2015). Smoking Cessation in Chronic Obstructive Pulmonary Disease. *Semin*  
948 *Respir Crit Care Med*, 36(4), 491-507. doi: 10.1055/s-0035-1555610
- 949 Tsien, R. Y. (1998). The green fluorescent protein. *Annual Review of Biochemistry*, 67, 509-544.  
950 doi: 10.1146/annurev.biochem.67.1.509
- 951 Turner, J. R., Castellano, L. M., & Blendy, J. A. (2011). Parallel anxiolytic-like effects and  
952 upregulation of neuronal nicotinic acetylcholine receptors following chronic nicotine and  
953 varenicline. *Nicotine Tob Res*, 13(1), 41-46.
- 954 Unger, E. K., Keller, J. P., Altermatt, M., Liang, R., Matsui, A., Dong, C., et al. (2020). Directed  
955 Evolution of a Selective and Sensitive Serotonin Sensor via Machine Learning. *Cell*,  
956 183(7), 1986-2002 e1926. doi: 10.1016/j.cell.2020.11.040
- 957 Winn, M. D., Ballard, C. C., Cowtan, K. D., Dodson, E. J., Emsley, P., Evans, P. R., et al. (2011).  
958 Overview of the CCP4 suite and current developments. *Acta Crystallographica D*  
959 *Biological Crystallography*, 67(Pt 4), 235-242. doi: 10.1107/S0907444910045749
- 960 Xiu, X., Puskar, N. L., Shanata, J. A., Lester, H. A., & Dougherty, D. A. (2009). Nicotine binding  
961 to brain receptors requires a strong cation- $\pi$  interaction. *Nature*, 458(7237), 534-537. doi:  
962 10.1038/nature07768  
963
